# Supplementary material for: Paspalines C–D and Paxillines B–D: New Indole Diterpenoids from Penicillium brefeldianum WZW-F-69
Source: MDPI journal article supplement (doi:10.3390/md20110684), 2022-10-29
Supplement: s1 [file s1]

Supplementary Material

## **Paspalines C–D and Paxillines B–D: New Indole Diterpenoids from *Penicillium brefeldianum* WZW-F-69**

**Weiwen Lin**<sup>1,2</sup>, **Hanpeng Li**<sup>1,2</sup>, **Zhiwen Wu**<sup>1,2</sup>, **Jingyi Su**<sup>1,2</sup>, **Zehong Zhang**<sup>1</sup>, **Li Yang**<sup>1</sup>, **Xianming Deng**<sup>1,2</sup> and **Qingyan Xu**<sup>1,2,\*</sup>

<sup>1</sup> State Key Laboratory of Cellular Stress Biology, School of Life Sciences, Xiamen University, Xiamen 361102, China

<sup>2</sup> State-Province Joint Engineering Laboratory of Targeted Drugs from Natural Products, Xiamen University, Xiamen 361102, China

\* Correspondence: xuqingyan@xmu.edu.cn; Tel.: +86-592-2180328

## Table of contents

|                                                               |    |
|---------------------------------------------------------------|----|
| 1. Taxonomy of <i>Penicillium brefeldianum</i> WZW-F-69 ..... | 6  |
| 2. Tabulated NMR data .....                                   | 7  |
| 3. NMR spectra .....                                          | 17 |
| 4. HR-ESI-MS data .....                                       | 43 |
| 5. ECD spectra.....                                           | 48 |
| 6. UV spectra .....                                           | 52 |
| 7. Strucutre of X-ray single crystal diffraction.....         | 54 |

## List of Sequence

|                  |   |
|------------------|---|
| Sequence S1..... | 6 |
|------------------|---|

## List of Tables

|                                                                            |    |
|----------------------------------------------------------------------------|----|
| Table S1. NMR (600 MHz, CDCl <sub>3</sub> ) data for paspaline C (1) ..... | 7  |
| Table S2. NMR (600 MHz, CDCl <sub>3</sub> ) data for paspaline D (2) ..... | 9  |
| Table S3. NMR (600 MHz, CDCl <sub>3</sub> ) data for paxilline B (3) ..... | 11 |
| Table S4. NMR (600 MHz, CDCl <sub>3</sub> ) data for paxilline C (4) ..... | 13 |
| Table S5. NMR (600 MHz, CDCl <sub>3</sub> ) data for paxilline D (5) ..... | 15 |

## List of Figures

|                                                                                                 |    |
|-------------------------------------------------------------------------------------------------|----|
| Figure S1. <sup>1</sup> H NMR (600 MHz, CDCl <sub>3</sub> ) spectrum of paspaline C (1) .....   | 17 |
| Figure S2. <sup>13</sup> C NMR (150 MHz, CDCl <sub>3</sub> ) spectrum of paspaline C (1) .....  | 17 |
| Figure S3. HSQC spectrum of paspaline C (1) .....                                               | 18 |
| Figure S4. HMBC spectrum of paspaline C (1) .....                                               | 18 |
| Figure S5. <sup>1</sup> H - <sup>1</sup> H COSY spectrum of paspaline C (1) .....               | 19 |
| Figure S6. NOE spectrum of paspaline C (1) .....                                                | 19 |
| Figure S7. <sup>1</sup> H NMR (600 MHz, CDCl <sub>3</sub> ) spectrum of paspaline D (2) .....   | 20 |
| Figure S8. <sup>13</sup> C NMR (150 MHz, CDCl <sub>3</sub> ) spectrum of paspaline D (2) .....  | 20 |
| Figure S9. HSQC spectrum of paspaline D (2) .....                                               | 21 |
| Figure S10. HMBC spectrum of paspaline D (2) .....                                              | 21 |
| Figure S11. <sup>1</sup> H - <sup>1</sup> H COSY spectrum of paspaline D (2) .....              | 22 |
| Figure S12. NOE spectrum of paspaline D (2) .....                                               | 22 |
| Figure S13. <sup>1</sup> H NMR (600 MHz, CDCl <sub>3</sub> ) spectrum of paxilline B (3) .....  | 23 |
| Figure S14. <sup>13</sup> C NMR (150 MHz, CDCl <sub>3</sub> ) spectrum of paxilline B (3) ..... | 23 |
| Figure S15. HSQC spectrum of paxilline B (3) .....                                              | 24 |
| Figure S16. HMBC spectrum of paxilline B (3).....                                               | 24 |
| Figure S17. <sup>1</sup> H - <sup>1</sup> H COSY spectrum of paxilline B (3).....               | 25 |
| Figure S18. NOE spectrum of paxilline B (3) .....                                               | 25 |
| Figure S19. <sup>1</sup> H NMR (600 MHz, CDCl <sub>3</sub> ) spectrum of paxilline C (4) .....  | 26 |
| Figure S20. <sup>13</sup> C NMR (150 MHz, CDCl <sub>3</sub> ) spectrum of paxilline C (4) ..... | 26 |

|                                                                                                                   |    |
|-------------------------------------------------------------------------------------------------------------------|----|
| Figure S21. HSQC spectrum of paxilline C (4) .....                                                                | 27 |
| Figure S22. HMBC spectrum of paxilline C (4).....                                                                 | 27 |
| Figure S23. <sup>1</sup> H - <sup>1</sup> H COSY spectrum of paxilline C (4).....                                 | 28 |
| Figure S24. NOE spectrum of paxilline C (4) .....                                                                 | 28 |
| Figure S25. <sup>1</sup> H NMR (600 MHz, CDCl <sub>3</sub> ) spectrum of paxilline D (5) .....                    | 29 |
| Figure S26. <sup>13</sup> C NMR (150 MHz, CDCl <sub>3</sub> ) spectrum of paxilline D (5) .....                   | 29 |
| Figure S27. HSQC spectrum of paxilline D (5) .....                                                                | 30 |
| Figure S28. HMBC spectrum of paxilline D (5).....                                                                 | 30 |
| Figure S29. <sup>1</sup> H - <sup>1</sup> H COSY spectrum of paxilline D (5).....                                 | 31 |
| Figure S30. NOE spectrum of paxilline D (5) .....                                                                 | 31 |
| Figure S31. <sup>1</sup> H NMR (600 MHz, CDCl <sub>3</sub> ) spectrum of paspaline (6).....                       | 32 |
| Figure S32. <sup>13</sup> C NMR (150 MHz, CDCl <sub>3</sub> ) spectrum of paspaline (6) .....                     | 32 |
| Figure S33. <sup>1</sup> H NMR (600 MHz, CDCl <sub>3</sub> ) spectrum of 1'-O-acetyl paxilline<br>(7).....        | 33 |
| Figure S34. <sup>13</sup> C NMR (150 MHz, CDCl <sub>3</sub> ) spectrum of 1'-O-acetyl paxilline (7) .             | 33 |
| Figure S35. <sup>1</sup> H NMR (600 MHz, CDCl <sub>3</sub> ) spectrum of 20-prenylated paxilline<br>(8) .....     | 34 |
| Figure S36. <sup>13</sup> C NMR (150 MHz, CDCl <sub>3</sub> ) spectrum of 20-prenylated paxilline<br>(8) .....    | 34 |
| Figure S37. <sup>1</sup> H NMR (600 MHz, CDCl <sub>3</sub> ) spectrum of 22-prenylated paxilline<br>(9) .....     | 35 |
| Figure S38. <sup>13</sup> C NMR (150 MHz, CDCl <sub>3</sub> ) spectrum of 22-prenylated paxilline<br>(9) .....    | 35 |
| Figure S39. <sup>1</sup> H NMR (600 MHz, CDCl <sub>3</sub> ) spectrum of 13-deoxy-paxilline (10)..                | 36 |
| Figure S40. <sup>13</sup> C NMR (150 MHz, CDCl <sub>3</sub> ) spectrum of 13-deoxy-paxilline (10) .               | 36 |
| Figure S41. <sup>1</sup> H NMR (600 MHz, CDCl <sub>3</sub> ) spectrum of paspalicine (11).....                    | 37 |
| Figure S42. <sup>13</sup> C NMR (150 MHz, CDCl <sub>3</sub> ) spectrum of paspalicine (11) .....                  | 37 |
| Figure S43. <sup>1</sup> H NMR (600 MHz, CDCl <sub>3</sub> ) spectrum of sherinine K (12).....                    | 38 |
| Figure S44. <sup>13</sup> C NMR (150 MHz, CDCl <sub>3</sub> ) spectrum of sherinine K (12) .....                  | 38 |
| Figure S45. <sup>1</sup> H NMR (600 MHz, CDCl <sub>3</sub> ) spectrum of 3-deoxo- 4b-deoxy paxillin<br>(13) ..... | 39 |

|                                                                                                                   |    |
|-------------------------------------------------------------------------------------------------------------------|----|
| Figure S46. $^{13}\text{C}$ NMR (150 MHz, $\text{CDCl}_3$ ) spectrum of 3-deoxo- 4b-deoxy paxilline (13).....     | 39 |
| Figure S47. $^1\text{H}$ NMR (600 MHz, $\text{CDCl}_3$ ) spectrum of 10-hydroxy-13-desoxy paxilline (14).....     | 40 |
| Figure S48. $^{13}\text{C}$ NMR (150 MHz, $\text{CDCl}_3$ ) spectrum of 10-hydroxy-13-desoxy paxilline (14) ..... | 40 |
| Figure S49. $^1\text{H}$ NMR (600 MHz, $\text{CDCl}_3$ ) spectrum of pyrapaxilline (15).....                      | 41 |
| Figure S50. $^{13}\text{C}$ NMR (150 MHz, $\text{CDCl}_3$ ) spectrum of pyrapaxilline (15) .....                  | 41 |
| Figure S51. $^1\text{H}$ NMR (600 MHz, $\text{CDCl}_3$ ) spectrum of shearinine (16).....                         | 42 |
| Figure S52. $^{13}\text{C}$ NMR (150 MHz, $\text{CDCl}_3$ ) spectrum of shearinine (16) .....                     | 42 |
| Figure S53. HR-ESI-MS data report of paspaline C (1) .....                                                        | 43 |
| Figure S54. HR-ESI-MS data report of paspaline D (2) .....                                                        | 44 |
| Figure S55. HR-ESI-MS data report of paxilline B (3) .....                                                        | 45 |
| Figure S56. HR-ESI-MS data report of paxilline C (4) .....                                                        | 46 |
| Figure S57. HR-ESI-MS data report of paxilline D (5) .....                                                        | 47 |
| Figure S58. ECD spectrum of paspaline C (1) .....                                                                 | 48 |
| Figure S59. ECD spectrum of paspaline D (2) .....                                                                 | 48 |
| Figure S60. ECD spectrum of paxilline B (3) .....                                                                 | 49 |
| Figure S61. ECD spectrum of paxilline C (4) .....                                                                 | 49 |
| Figure S62. ECD spectrum of paxilline d (5) .....                                                                 | 50 |
| Figure S63. ECD spectrum of compound 3, 4 and 7 .....                                                             | 51 |
| Figure S64. UV spectrum of paspaline C (1) .....                                                                  | 52 |
| Figure S65. UV spectrum of paspaline D (2) .....                                                                  | 52 |
| Figure S66. UV spectrum of paxilline B (3) .....                                                                  | 53 |
| Figure S67. UV spectrum of paxilline C (4) .....                                                                  | 53 |
| Figure S68. UV spectrum of paxilline D (5) .....                                                                  | 54 |
| Figure S69. X-ray single crystal diffraction structure of paspaline (6) .....                                     | 54 |

Sequence S1: Taxonomy of *Penicillium brefeldianum* WZW-F-69

ATGCCCCGGCAACAGCATGATCCGAGGTCAGAGTGTA AAAAATGTACT  
TTTTGGACGTCGTCGTTATGAGTGCAAAGCGCGAGATGTACTGCGCTC  
CGAAATCAATACGCCGGCTGCCAATTGTTTTGAGGCGAGTCTGCGCGC  
AGAGGCGAGACAAACACCCAACACCAAGCAAAGCTTGAAGGTACAAA  
TGACGCTCGAACAGGCATGCCCCATGGAATACCAAGGGGCGCAATGT  
GCGTTCAAAGATTCGATGATTCACTGAATTCTGCAATTCACACTACTTA  
TCGCATTTTCGCTGCGTTCTTCATCGATGCCAGAACCAAGAGATCCGTTG  
TTGAAAGTTGTAACTATTAAGTTTTTCAGACGCTGATTGCAACTACA  
AAGGGTTTAAATGTGTCCAATCGGCGGGCGGACCCGCCGAGGAAACG  
AAGGTACTCAAAGACATGGGTAAGAGATAGCAGGCAAAGCCTACAA  
CTCTAGGTAATGATCCTTCCGCAGGTTACCCCTACGGAAA

Table S1. NMR (600 MHz, CDCl<sub>3</sub>) data for paspaline C (**1**)

| <i>No.</i> | $\delta_H$ ( <i>mult.</i> , <i>J</i> [Hz], <i>int.</i> ) | $\delta_c$ | <i>HMBC</i>          | <i><sup>1</sup>H-<sup>1</sup>H COSY</i> | <i>NOE</i>         |
|------------|----------------------------------------------------------|------------|----------------------|-----------------------------------------|--------------------|
| 1          | 7.74 (s)                                                 | /          | C-2, C-19, C-24      | /                                       | H-23               |
| 2          | /                                                        | 150.8s     | /                    | /                                       | /                  |
| 3          | /                                                        | 53.1s      | /                    | /                                       | /                  |
| 4          | /                                                        | 39.3s      | /                    | /                                       | /                  |
| 5          | 1.94 (dd, 11.3, 5.8)                                     | 33.6t      | C-6                  | H-13                                    | /                  |
|            | 1.62 (m)                                                 |            | /                    | /                                       | /                  |
| 6          | 1.89 (dd, 14.7, 2.7)                                     | 26.9t      | C-5, C-7             | H-7                                     | /                  |
|            | 1.87 (m)                                                 |            | C-7                  | H-7                                     | /                  |
| 7          | 3.59 (dd, 9.8, 5.9)                                      | 72.8d      | C-11, C-30           | H-6, H-14                               | H-13               |
| 9          | 3.68 (dd, 8.3, 4.6)                                      | 84.1d      | C-11, C-29, C-31 (w) | H <sub>3</sub> -29                      | /                  |
| 10         | 1.34 (dd, 12.1, 5.6)                                     | 22.2t      | /                    | H-9                                     | /                  |
|            | 1.32 (m)                                                 |            |                      |                                         |                    |
| 11         | $\alpha$ 1.70 (td, 12.9, 3.0)                            | 33.9t      | C-4, C-10            | /                                       | /                  |
|            | $\beta$ 1.41 (m)                                         |            | /                    | H-11 $\alpha$                           | /                  |
| 12         | /                                                        | 39.9s      | /                    | /                                       | /                  |
| 13         | 1.69 (s)                                                 | 41.4d      | C-30                 | H <sub>3</sub> -33                      | H <sub>3</sub> -25 |
| 14         | 1.81 (d, 12.6)                                           | 25.2t      | C-12, C-26           | /                                       | /                  |
|            | 1.64 (bro)                                               |            | /                    | H-13                                    | /                  |
| 15         | 1.71 (m)                                                 | 23.0t      | /                    | H-13                                    | /                  |
|            | 1.49 (dd, 12.4, 4.4)                                     |            |                      |                                         |                    |
| 16         | 2.78 (m)                                                 | 48.7d      | /                    | H-17                                    | H <sub>3</sub> -26 |
| 17         | 2.70 (dd, 13.2, 6.5)                                     | 27.5t      | C-2, C-3, C-16, C-18 |                                         | /                  |
|            | 2.35 (dd, 13.2, 10.6)                                    |            | C-2, C-18            |                                         | /                  |
| 18         | /                                                        | 118.4s     | /                    | /                                       | /                  |
| 19         | /                                                        | 125.4s     | /                    | /                                       | /                  |
| 20         | 7.45 (m)                                                 | 118.3d     | C-22, C-24           | H-21                                    | /                  |

|    |          |        |                       |                    |      |
|----|----------|--------|-----------------------|--------------------|------|
| 21 | 7.10 (m) | 119.6d | C-18, C-19, C-24      | H-23, H-20         | /    |
| 22 | 7.10 (m) | 120.5d | /                     | /                  | /    |
| 23 | 7.32 (m) | 111.4d | C-19, C-21            | H-22               | /    |
| 24 | /        | 140.0s | /                     | /                  | /    |
| 25 | 1.04 (s) | 14.7q  | C-2, C-3, C-4, C-16   | /                  | H-13 |
| 26 | 1,14 (s) | 19.2q  | C-3, C-4, C-5         | H <sub>2</sub> -5  | /    |
| 27 | /        | 80.1s  | /                     | /                  | /    |
| 28 | 1.16 (s) | 22.9q  | C-9, C-27, C-29       | H <sub>3</sub> -29 | /    |
| 29 | 1.30 (s) | 26.3q  | C-9, C-27, C-28       | H <sub>3</sub> -28 | /    |
| 30 | 0.89 (s) | 16.5q  | C-7, C-11, C-12, C-13 | /                  | /    |
| 31 | /        | 106.5s | /                     | /                  | /    |
| 32 | 1.37 (s) | 27.1q  | C-7 (w), C-31, C-33   | /                  | /    |
| 33 | 1.45 (s) | 28.6q  | C-31, C-32            | /                  |      |

---

Table S2. NMR (600 MHz, CDCl<sub>3</sub>) data for paspaline D (2)

| <i>No</i> | $\delta_H$ ( <i>mult.</i> , <i>J</i> [Hz], <i>int.</i> ) | $\delta_C$ | <i>HMBC</i>                | <i><sup>1</sup>H-<sup>1</sup>H COSY</i> | <i>NOE</i>               |
|-----------|----------------------------------------------------------|------------|----------------------------|-----------------------------------------|--------------------------|
| 1         | 7.77 (s)                                                 | /          | C-2, C-16, C-18, C-19      | /                                       | H <sub>3</sub> -25, H-23 |
| 2         | /                                                        | 150.6s     | /                          | /                                       | /                        |
| 3         | /                                                        | 53.1s      | /                          | /                                       | /                        |
| 4         | /                                                        | 39.3s      | /                          | /                                       | /                        |
| 5         | 2.05 (dd, 13.7, 4.6)                                     | 33.1t      | C-6, C-26                  | H <sub>2</sub> -6                       | /                        |
|           | 2.01 (dd, 12.5, 5.4)                                     |            | /                          | H-15                                    | H-7                      |
| 6         | 1.90 (2H, m)                                             | 23.8t      | C-5                        | H-5, H-7                                | /                        |
| 7         | 4.80 (dd, 10.2, 5.9)                                     | 75.5d      | C-6, C-7, C-11, C-30, C-31 | H <sub>2</sub> -6                       | H-13                     |
| 9         | 3.57 (dd, 8.5, 4.3)                                      | 83.6d      | C-11, C-28, C-29           | H <sub>3</sub> -29                      | /                        |
| 10        | 1.59 (m)                                                 | 22.6t      | C-7                        | /                                       | /                        |
| 11        | 1.55 (m)                                                 | 34.4t      | C-9                        | /                                       | H-7                      |
|           | 1.32 (m)                                                 |            | /                          | /                                       | /                        |
| 12        | /                                                        | 40.2s      | /                          | /                                       | /                        |
| 13        | 1.78 (dd, 12.7, 3.1)                                     | 40.4d      | C-7 (w)                    | /                                       | H <sub>3</sub> -25       |
| 14        | 1.82 (m)                                                 | 25.1t      | C-4 (w)                    | /                                       | /                        |
|           | 1.65 (td, 12.9, 4.1)                                     |            | C-16 (w)                   | /                                       | /                        |
| 15        | 1.60 (m, 2H)                                             | 22.7t      | C-13, C-16                 | H-16                                    | H-1                      |
| 16        | 2.78 (m)                                                 | 48.7d      | C-17                       | H-14, H-15                              | H <sub>3</sub> -26       |
| 17        | 2.70 (dd, 13.2, 6.4)                                     | 27.5t      | C-2, C-16, C-18            | /                                       | /                        |
|           | 2.36(dd, 13.3,10.6)                                      |            |                            | /                                       | /                        |
| 18        | /                                                        | 118.3s     | /                          | /                                       | /                        |
| 19        | /                                                        | 125.1s     | /                          | /                                       | /                        |
| 20        | 7.44 (m)                                                 | 118.4d     | C-22, C-24                 | H-21                                    | /                        |
| 21        | 7.09 (m)                                                 | 119.6d     | C-19, C-23                 | H-20, H-23                              | /                        |
| 22        | 7.09 (m)                                                 | 120.5d     | C-20, C-24                 | /                                       | /                        |

|    |              |        |                      |      |                          |
|----|--------------|--------|----------------------|------|--------------------------|
| 23 | 7.32 (m)     | 111.5d | C-19, C-21           | H-21 | H-1                      |
| 24 | /            | 139.9s | /                    | /    | /                        |
| 25 | 1.05 (s, 3H) | 14.7q  | C-2, C-3, C-4 , C-16 | /    | H-13                     |
| 26 | 1.16 (s, 3H) | 19.3q  | C-3, C-4, C-5        | H-5  | H <sub>3</sub> -30, H-16 |
| 30 | 0.97 (s, 3H) | 17.5q  | C-7, C-11, C-12      | /    | H <sub>3</sub> -26       |
| 27 | /            | 80.1s  | /                    | /    | /                        |
| 28 | 1.13 (s, 3H) | 23.0q  | C-9, C-27, C-29      | /    | /                        |
| 29 | 1.27 (s, 3H) | 26.4q  | C-9, C-27, C-28      | /    | H-9, H <sub>3</sub> -26  |
| 30 | 0.97 (s, 3H) | 17.5q  | C-7, C-11, C-12      | /    | H-24, H <sub>3</sub> -29 |
| 31 | /            | 170.7s | /                    | /    | /                        |
| 32 | 2.09 (s, 3H) | 21.3q  | C-31                 | /    | /                        |

---

Table S3. NMR (600 MHz, CDCl<sub>3</sub>) data for paxilline B (**3**)

| No. | $\delta_H$ ( <i>mult.</i> , <i>J</i> [Hz],<br><i>int.</i> ) | $\delta_C$ | HMBC             | <sup>1</sup> H- <sup>1</sup> H<br>COSY | NOE                |
|-----|-------------------------------------------------------------|------------|------------------|----------------------------------------|--------------------|
| 1   | 7.78 (s)                                                    | /          | C-2, C-18, C-24  | /                                      | /                  |
| 2   | /                                                           | 151.0s     | /                | /                                      | /                  |
| 3   | /                                                           | 50.5s      | /                | /                                      | /                  |
| 4   | /                                                           | 43.1s      | /                | /                                      | /                  |
| 5   | 2.80 (td, 13.5,4.9)                                         | 28.1t      | C-4              | H-6                                    | /                  |
|     | 1.49 (m)                                                    |            | C-4,             | H-6                                    | /                  |
| 6   | 2.31 (m)                                                    | 28.3t      | /                | H-5                                    | /                  |
|     | 1.95 (m)                                                    |            | /                | H-5                                    | /                  |
| 7   | 4.84 (m)                                                    | 72.9d      | C-12             | H-7                                    | H <sub>3</sub> -25 |
| 9   | 4.85 (m)                                                    | 80.4d      | C-7, C-10, C-11  | /                                      | H-7                |
| 10  | /                                                           | 195.3s     | /                | /                                      | /                  |
| 11  | 5.85 (d, 2.1)                                               | 120.1d     | C-10, C-12       | /                                      | /                  |
| 12  | /                                                           | 166.1s     | /                | /                                      | /                  |
| 13  | /                                                           | 77.5s      | /                | /                                      | /                  |
| 14  | 2.08 (m)                                                    | 34.4t      | /                | H-15                                   | /                  |
|     | 1.66 (m)                                                    |            | /                | H-15                                   | /                  |
| 15  | 2.07 (m)                                                    | 20.9t      | /                | H-16                                   | /                  |
| 16  | 2.89 (d, 2.8)                                               | 49.6d      | /                | H-15                                   | H <sub>3</sub> -26 |
| 17  | 2.91 (d, 6.2)                                               | 29.0t      | C-2, C-18        | /                                      | /                  |
|     | β 2.62 (m)                                                  |            | C-2, C-18        | /                                      | /                  |
| 18  | /                                                           | 116.9s     | /                | /                                      | /                  |
| 19  | /                                                           | 124.4s     | /                | /                                      | /                  |
| 20  | /                                                           | 133.1s     | /                | /                                      | /                  |
| 21  | 6.88 (dd, 7.3, 0.8)                                         | 119.0d     | C-19, C-23, C-32 | H-22                                   | /                  |
| 22  | 7.03 (dd, 8.1, 7.3)                                         | 121.0d     | C-20, C-24       | H-23                                   | /                  |
| 23  | 7.17 (dd, 8.1, 1.0)                                         | 109.3d     | C-19, C-21       | H-22                                   | /                  |

|    |               |        |                     |   |      |
|----|---------------|--------|---------------------|---|------|
| 24 | /             | 139.7s | /                   | / | /    |
| 25 | 1.34 (s, 3H)  | 16.2q  | C-2, C-3, C-4, C-16 | / | H-7  |
| 26 | 1.08 (s, 3H)  | 19.8q  | C-3, C-4, C-13      | / | H-16 |
| 27 | /             | 81.9s  | /                   | / | /    |
| 28 | 1.46 (s, 3H)  | 22.8q  | C-9, C-27           | / | /    |
| 29 | 1.68 (s, 3H)  | 23.8q  | C-9, C-27           | / | /    |
| 30 | /             | 170.8s | /                   | / | /    |
| 31 | 2.06 (s, 3H)  | 22.3q  | C-30                | / | /    |
| 32 | 3.64 (d, 7.2) | 32.0t  | /                   | / | /    |
| 33 | 5.43 (m)      | 123.7d | /                   | / | /    |
| 34 | /             | 131.8s | /                   | / | /    |
| 35 | 1.78 (s)      | 18.0q  | C-33, C-34          | / | /    |
| 36 | 1.77 (s)      | 25.8q  | C-33, C-34          | / | /    |

---

Table S4. NMR (600 MHz, CDCl<sub>3</sub>) data for paxilline C (**4**)

| No | $\delta_H$ ( <i>mult.</i> , <i>J</i> [Hz],<br><i>int.</i> ) | $\delta_c$ | HMBC                  | <sup>1</sup> H- <sup>1</sup> H<br>COSY | NOE  |
|----|-------------------------------------------------------------|------------|-----------------------|----------------------------------------|------|
| 1  | 7.70 (s)                                                    | /          | C-2, C-18, C-19, C-24 | /                                      | /    |
| 2  | /                                                           | 151.9s     | /                     | /                                      | /    |
| 3  | /                                                           | 50.7s      | /                     | /                                      | /    |
| 4  | /                                                           | 43.1s      | /                     | /                                      | /    |
| 5  | 2.78 (td, 13.7, 4.4)                                        | 28.0t      | /                     | H-6                                    | /    |
|    | 1.47 (m)                                                    |            | /                     | H-6                                    | /    |
| 6  | 2.31 (m)                                                    | 28.3t      | /                     | H-5, H-7                               | /    |
|    | 1.93 (m)                                                    |            | /                     | H-5, H-7                               | /    |
| 7  | 4.84 (m)                                                    | 72.9d      | /                     | H-6                                    | H-25 |
| 9  | 4.85 (brs)                                                  | 80.4d      | /                     | /                                      | H-25 |
| 10 | /                                                           | 195.3s     | /                     | /                                      | /    |
| 11 | 5.84 (d, 2.0)                                               | 120.1d     | C-7, C-13             | /                                      | /    |
| 12 | /                                                           | 166.1s     | /                     | /                                      | /    |
| 13 | /                                                           | 77.5s      | /                     | /                                      | /    |
| 14 | 2.07 (m)                                                    | 34.4t      | /                     | H-15                                   | /    |
|    | 1.67 (m)                                                    |            | /                     | H-15                                   | /    |
| 15 | 2.05 (m)                                                    | 20.9t      | /                     | H-14                                   | /    |
|    | 1.80 (m)                                                    |            | /                     | /                                      | /    |
| 16 | 2.85 (m)                                                    | 49.6d      | /                     | H-17                                   | H-26 |
| 17 | 2.74 (dd, 13.0, 6.3)                                        | 27.2t      | C-2, C-18             | H-16                                   | /    |
|    | 2.45 (dd, 13.2, 10.9)                                       |            | C-3, C-18             | /                                      | /    |
| 18 | /                                                           | 117.1s     | /                     | /                                      | /    |
| 19 | /                                                           | 125.6s     | /                     | /                                      | /    |
| 20 | 7.25 (brs)                                                  | 117.6d     | C-21, C-32, C-24      | /                                      | /    |
| 21 | /                                                           | 133.3s     | /                     | /                                      | /    |
| 22 | 6.94 (dd, 8.1, 1.7)                                         | 121.4d     | C-20, C-32            | H-23                                   | /    |

|    |                     |        |                     |      |          |
|----|---------------------|--------|---------------------|------|----------|
| 23 | 7.23 (dd, 8.1, 1.0) | 111.3d | C-19, C-21          | H-22 | /        |
| 24 | /                   | 138.2s | /                   | /    | /        |
| 25 | 1.33 (s)            | 16.2q  | C-2, C-3, C-4, C-16 | /    | H-6, H-9 |
| 26 | 1.05 (s)            | 19.7q  | C-3, C-4, C-5, C-13 | /    | H-16     |
| 27 | /                   | 81.9s  | /                   | /    | /        |
| 28 | 1.46 (s)            | 22.8q  | C-9, C-27           | /    | /        |
| 29 | 1.68 (s)            | 23.8q  | C-9, C-27, C-30     | /    | /        |
| 30 | /                   | 170.8s | /                   | /    | /        |
| 31 | 2.06 (s)            | 22.3q  | C-30                | /    | /        |
| 32 | 3.43 (d, 7.3)       | 34.5t  | C-20, C-22          | H-33 | /        |
| 33 | 5.40 (m)            | 124.6d | /                   | H-32 | /        |
| 34 | /                   | 131.4s | /                   | /    | /        |
| 35 | 1.77 (s)            | 17.8q  | C-33, C-34          | /    | /        |
| 36 | 1.76 (s)            | 25.8q  | C-33, C-34          | /    | /        |

---

Table S5. NMR (600 MHz, CDCl<sub>3</sub>) data for paxilline D (5)

| No. | $\delta_H$ (mult., $J$ [Hz],<br>int.) | $\delta_C$ | HMBC                        | $^1H$ - $^1H$<br>COSY | $^1H$ - $^1H$<br>NOE |
|-----|---------------------------------------|------------|-----------------------------|-----------------------|----------------------|
| 1   | 7.79 (s)                              | /          | C-20, C-19, C-24, C-2       | /                     | H-23, H-5 $\beta$    |
| 2   | /                                     | 149.3s     | /                           | /                     | /                    |
| 3   | /                                     | 50.5s      | /                           | /                     | /                    |
| 4   | /                                     | 42.4s      | /                           | /                     | /                    |
| 5   | 2.15 (td, 13.7, 4.0)                  | 31.4t      | C-26                        | H-6, H-17             | /                    |
|     | 1.58 (m)                              |            | C-7                         | H <sub>2</sub> -15    | /                    |
| 6   | 2.43 (m)                              | 28.8t      | C-31, C-4, C-7              | H-5                   | /                    |
|     | 1.90 (dd, 14.6, 4.3)                  |            | /                           | /                     | /                    |
| 7   | /                                     | 96.5s      | /                           | /                     | /                    |
| 9   | 4.06 (s)                              | 76.9d      | C-15, C-7, C-10, C-27       | /                     | H <sub>3</sub> -31   |
| 10  | /                                     | 198.5s     | /                           | /                     | /                    |
| 11  | 5.81 (d, 2.0)                         | 122.1d     | C-7, C-13                   | H-13                  | /                    |
| 12  | /                                     | 165.1s     | /                           | /                     | /                    |
| 13  | 2.83 (m)                              | 42.0d      | C-12, C-4, C-26, C-11, C-14 | H-14 $\beta$          | H <sub>3</sub> -25   |
| 14  | 1.72 (m)                              | 25.5t      | C-16, C-4                   | H-14 $\beta$ , H-13   | /                    |
|     | 1.52 (m)                              |            | C-13                        | H-13                  | /                    |
| 15  | 1.86 (m)                              | 24.1t      | C-13, C-3                   | H-17 $\beta$ , H-13   | /                    |
| 16  | 2.85 (m)                              | 49.0d      | C-17                        | H-14 $\alpha$         | H-6 $\beta$          |
| 17  | 2.76 (dd, 13.4, 6.4)                  | 27.3t      | C-3, C-18, C-2              | H-17 $\beta$          | /                    |
|     | 2.44 (m)                              |            | /                           | H-17 $\alpha$         | /                    |
| 18  | /                                     | 118.4s     | /                           | /                     | /                    |
| 19  | /                                     | 125.0s     | /                           | /                     | /                    |
| 20  | 7.47 (dd, 6.8, 2.2)                   | 118.5d     | C-24, C-21                  | H-21                  | /                    |
| 21  | 7.12 (m)                              | 120.8d     | C-19, C-23                  | H-20                  | /                    |

|    |                     |        |               |      |                    |
|----|---------------------|--------|---------------|------|--------------------|
| 22 | 7.12 (m)            | 119.8d | C-20, C-24    | H-23 |                    |
| 23 | 7.33 (dd, 6.8, 2.2) | 111.4d | C-22, C-19    | H-22 |                    |
| 24 | /                   | 140.0s | /             | /    | /                  |
| 25 | 1.12 (s)            | 14.7q  | C-2, C-4, C-3 | /    | H-13, H-6 $\alpha$ |
| 26 | 1.03 (s)            | 15.9q  | C-3, C-5, C-4 | /    | H-16               |
| 27 | /                   | 72.4s  | /             | /    | /                  |
| 28 | 1.29 ( s)           | 24.0q  | C-27, C-29    | /    | /                  |
| 29 | 1.35 (s)            | 26.7q  | C-28, C-27    | 4.22 | /                  |
| 32 | 3.40 (s)            | 49.1q  | C-7           | /    | H-9, H-6 $\alpha$  |

---

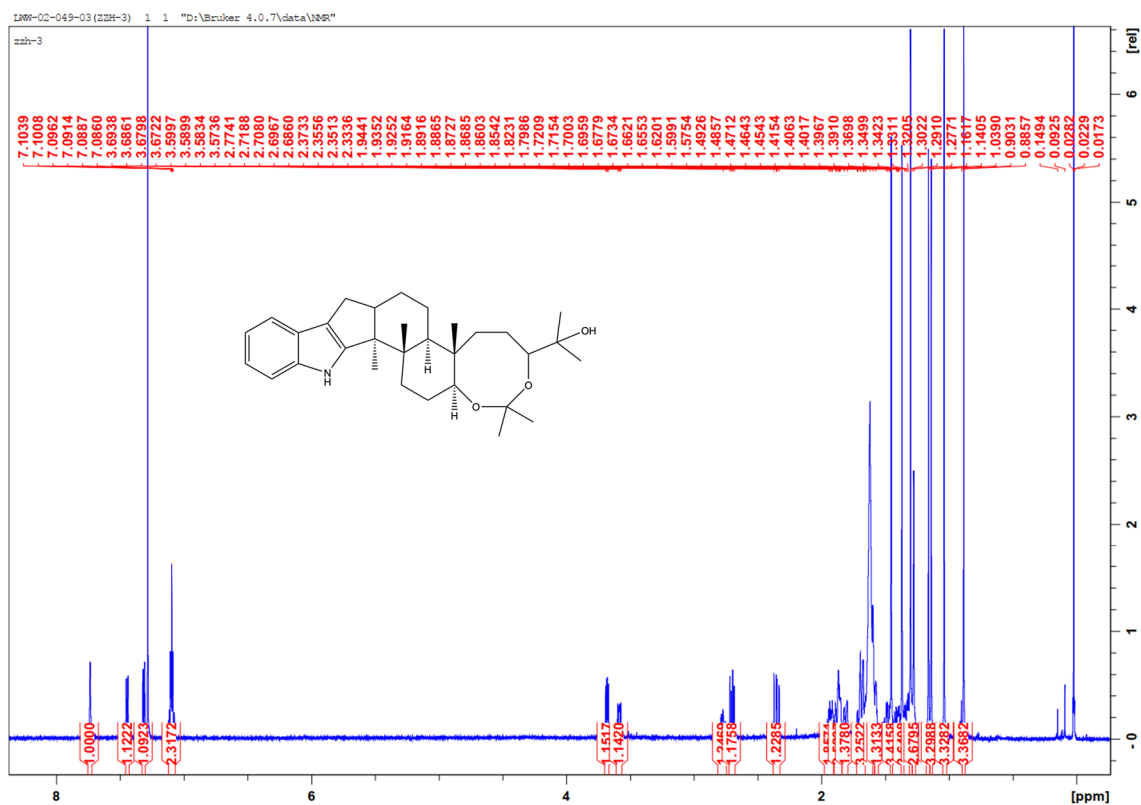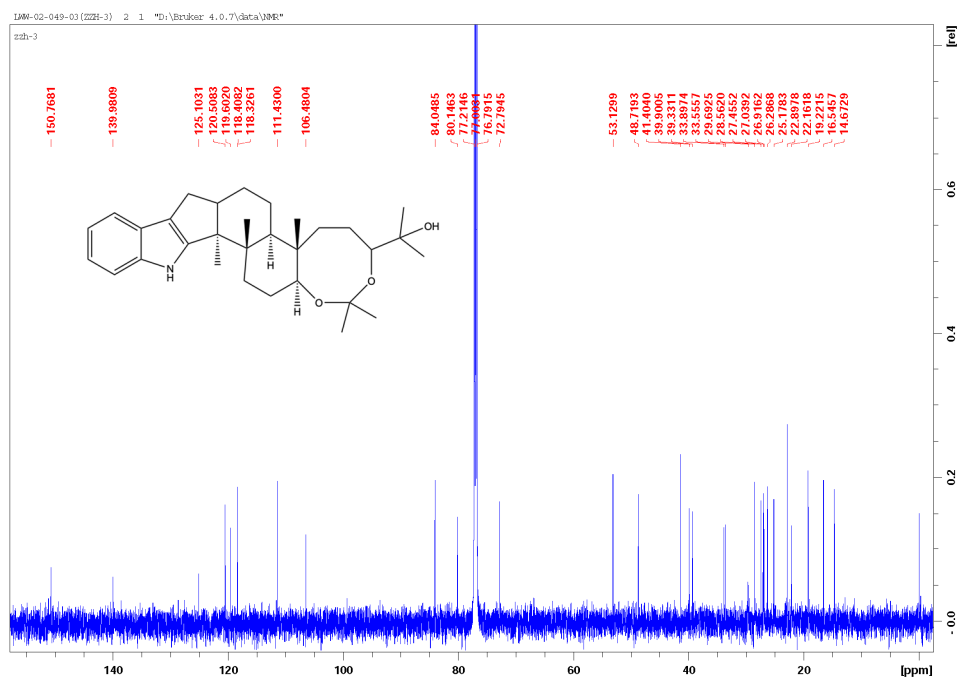

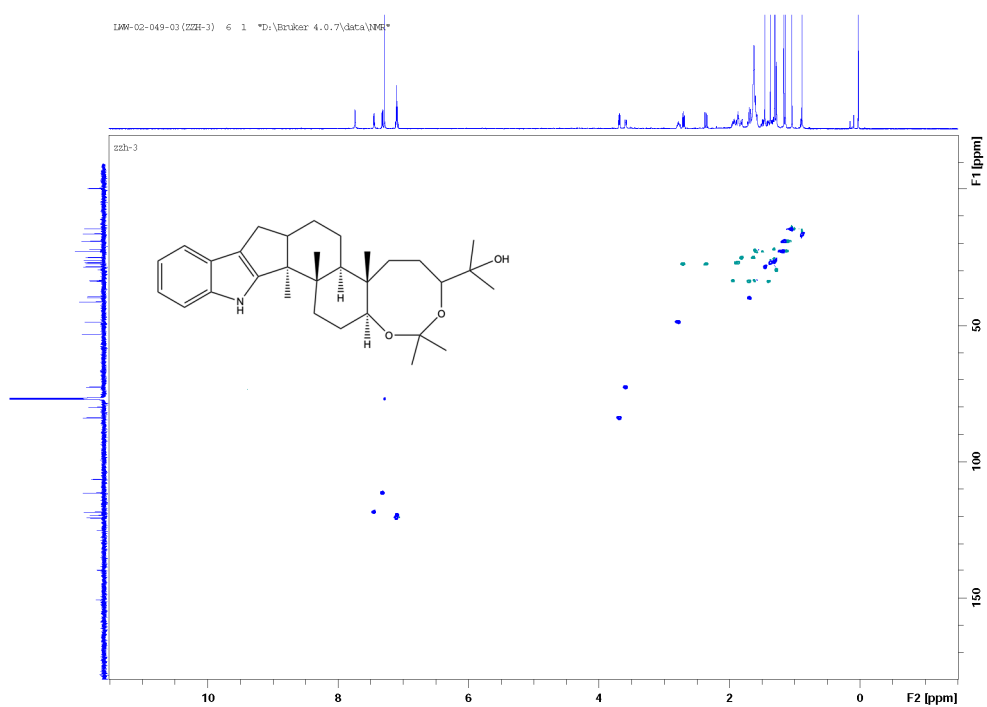

Figure S3. HSQC spectrum of paspaline C (**1**)

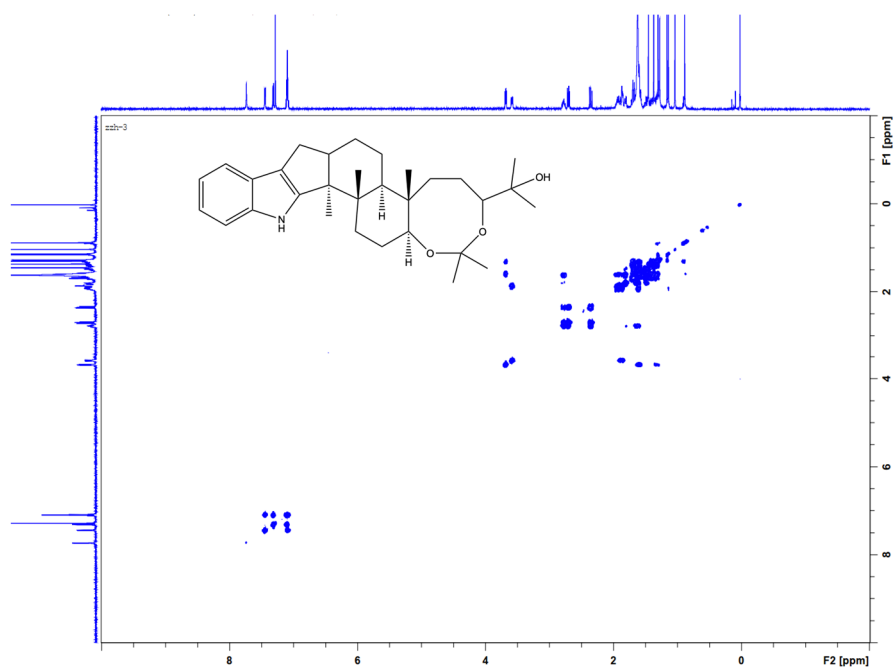

Figure S4. HMBC spectrum of paspaline C (**1**)

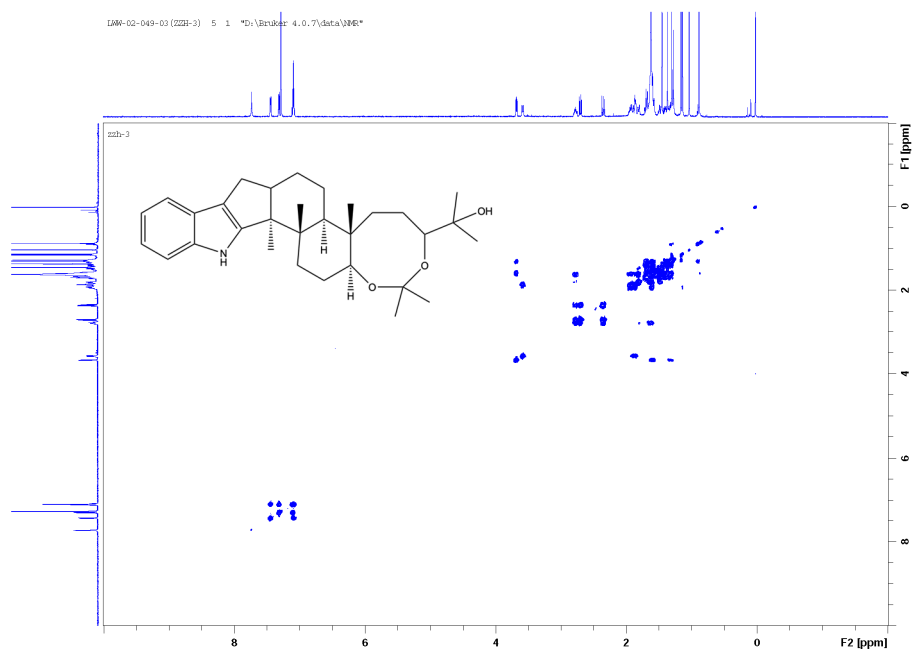

Figure S5.  $^1\text{H}$ - $^1\text{H}$  COSY spectrum of paspaline C (**1**)

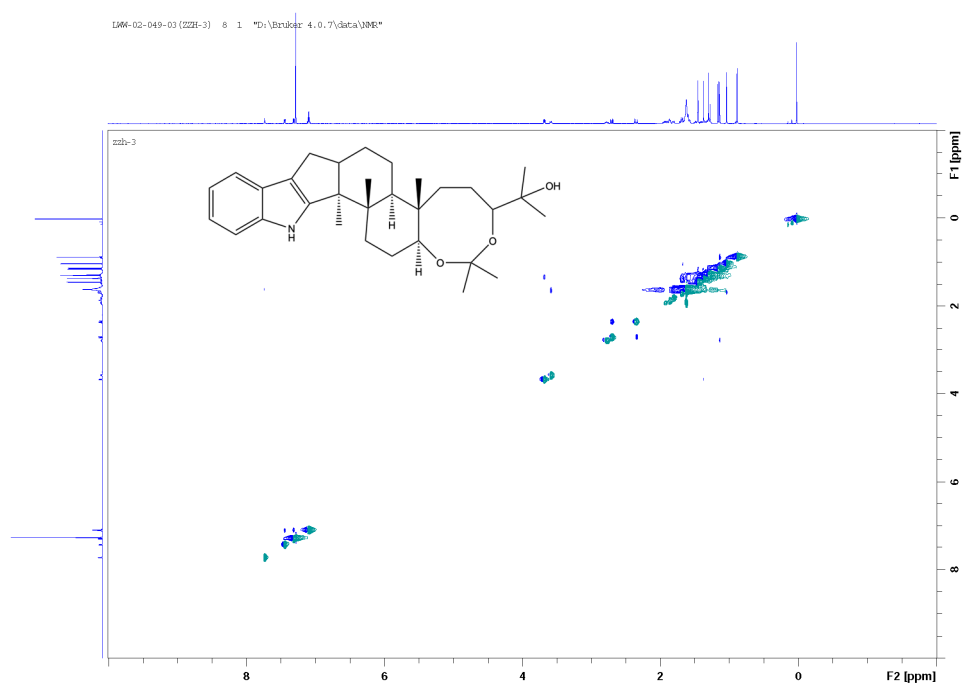

Figure S6. NOE spectrum of paspaline C (**1**)



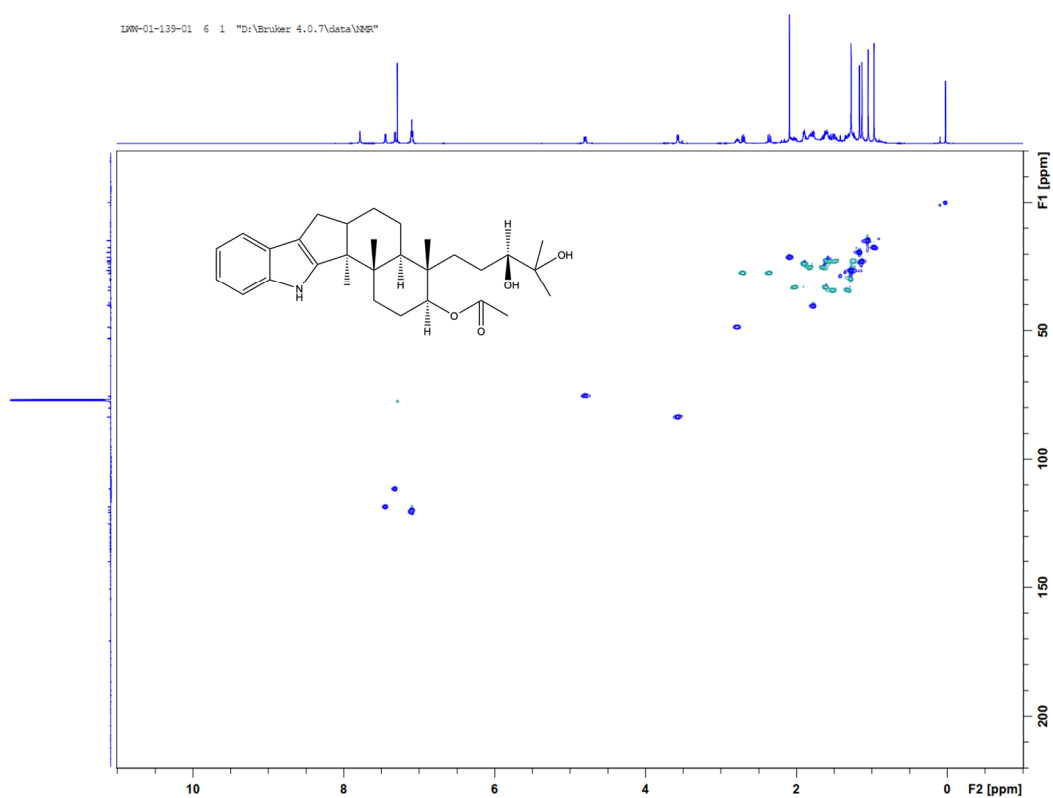

Figure S9. HSQC spectrum of paspaline D (2)

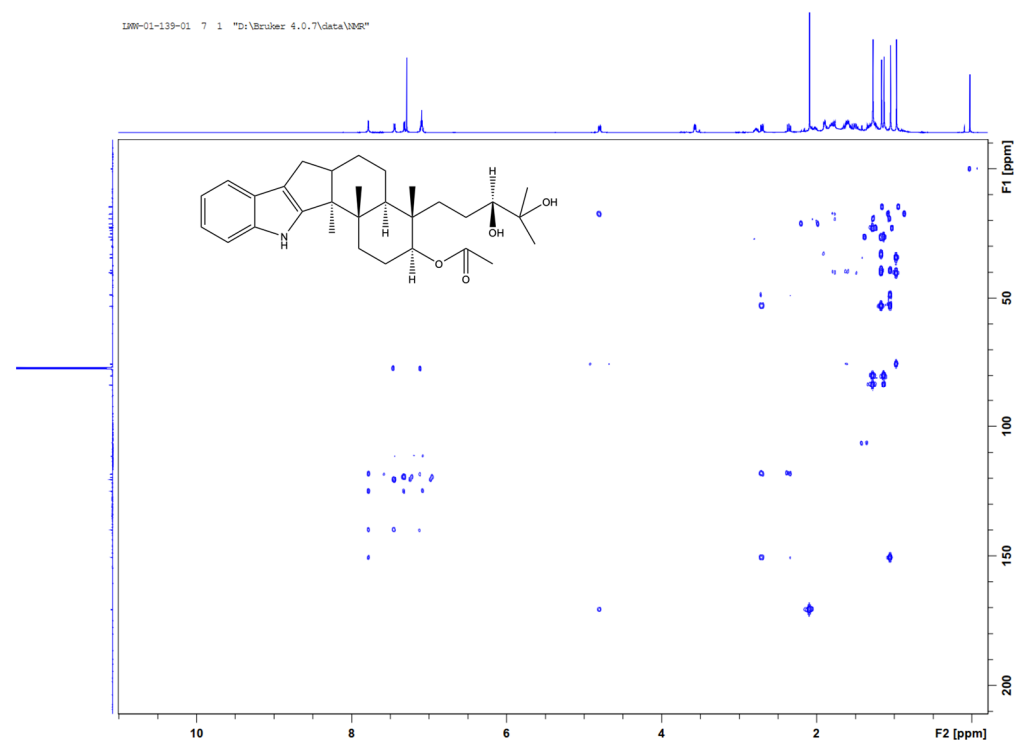

Figure S10. HMBC spectrum of paspaline D (2)

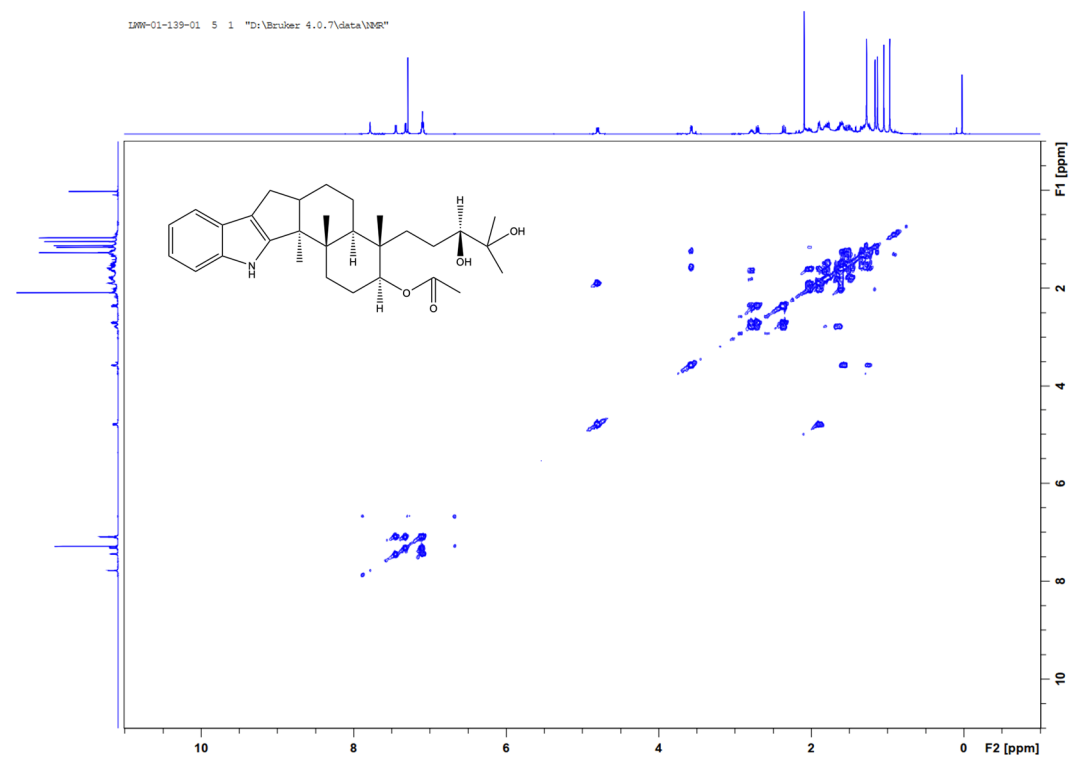

Figure S11.  $^1\text{H}$ - $^1\text{H}$  COSY spectrum of paspaline D (2)

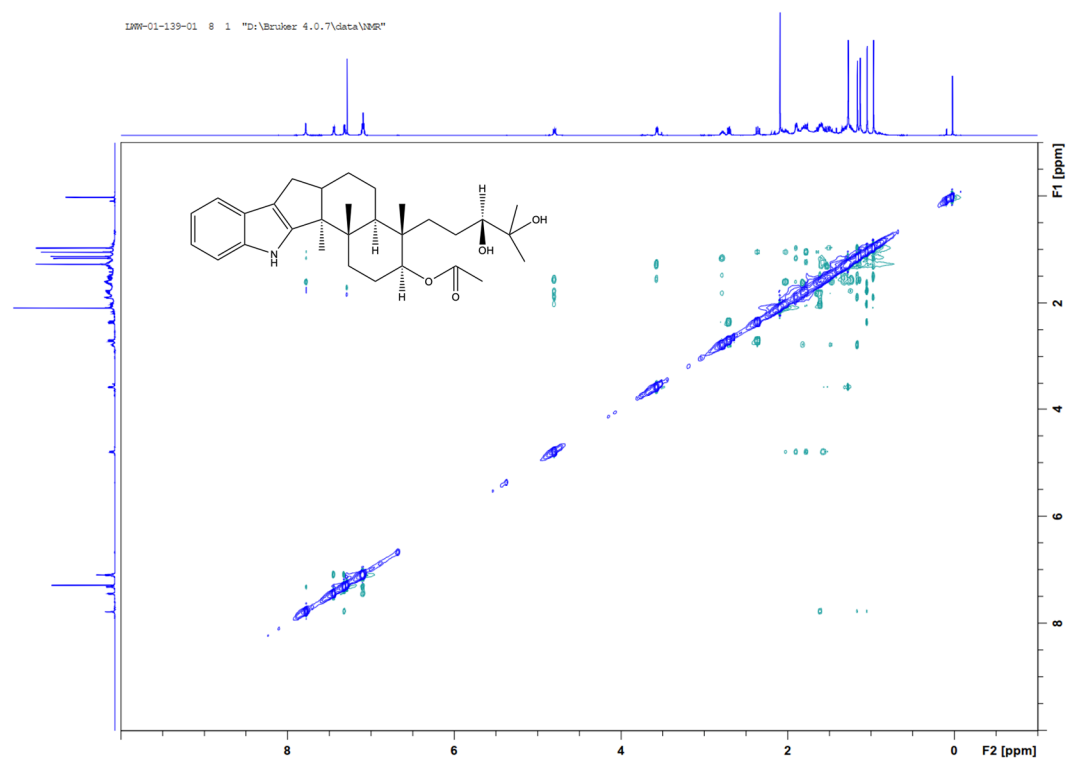

Figure S12. NOE spectrum of paspaline D (2)

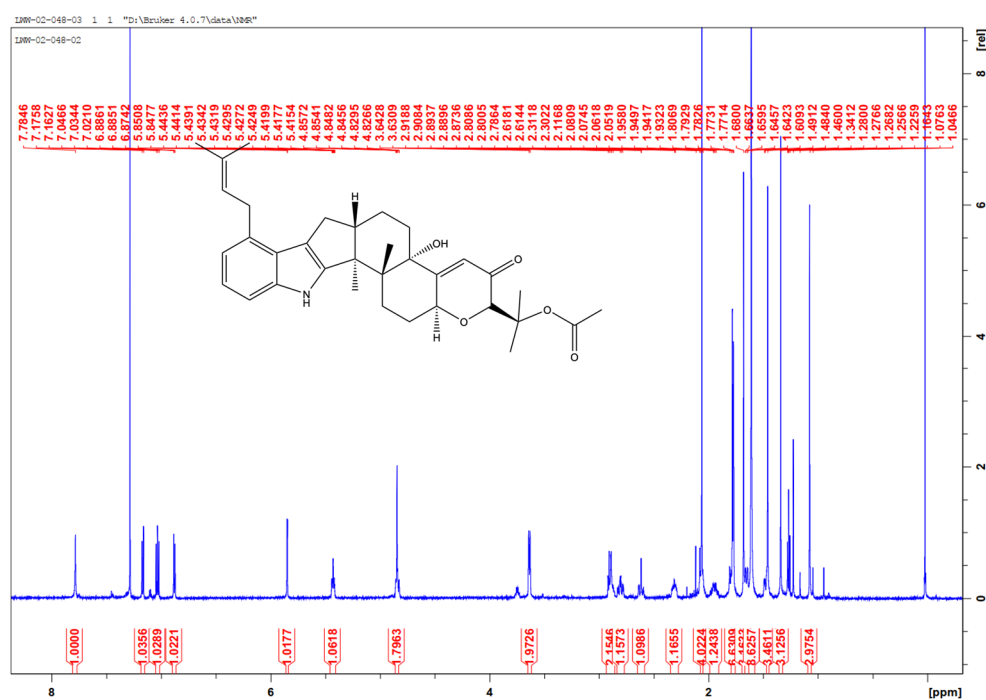

Figure S13. <sup>1</sup>H NMR (600 MHz, CDCl<sub>3</sub>) spectrum of paxilline B (3)

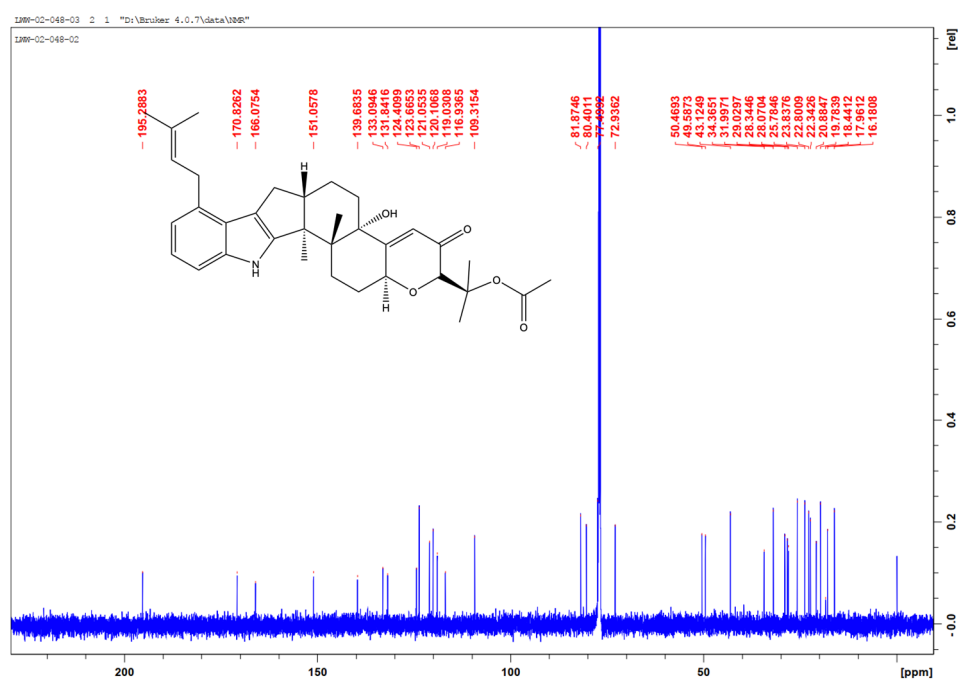

Figure S14. <sup>13</sup>C NMR (150 MHz, CDCl<sub>3</sub>) spectrum of paxilline B (3)

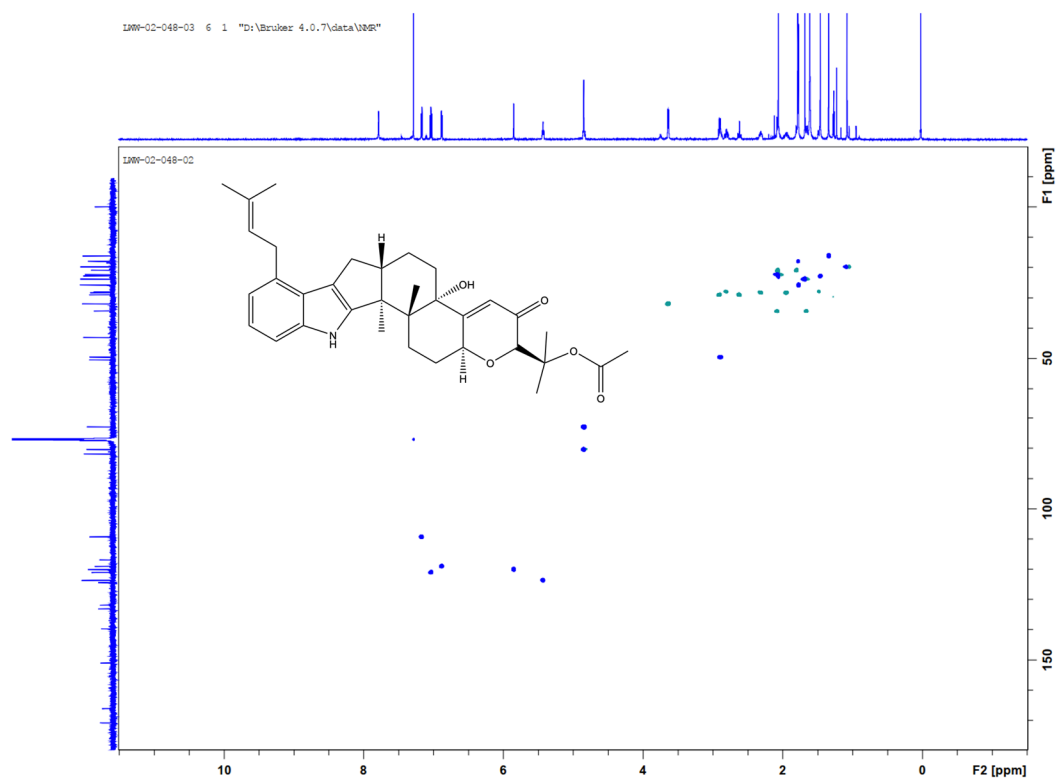

Figure S15. HSQC spectrum of paxilline B (3)

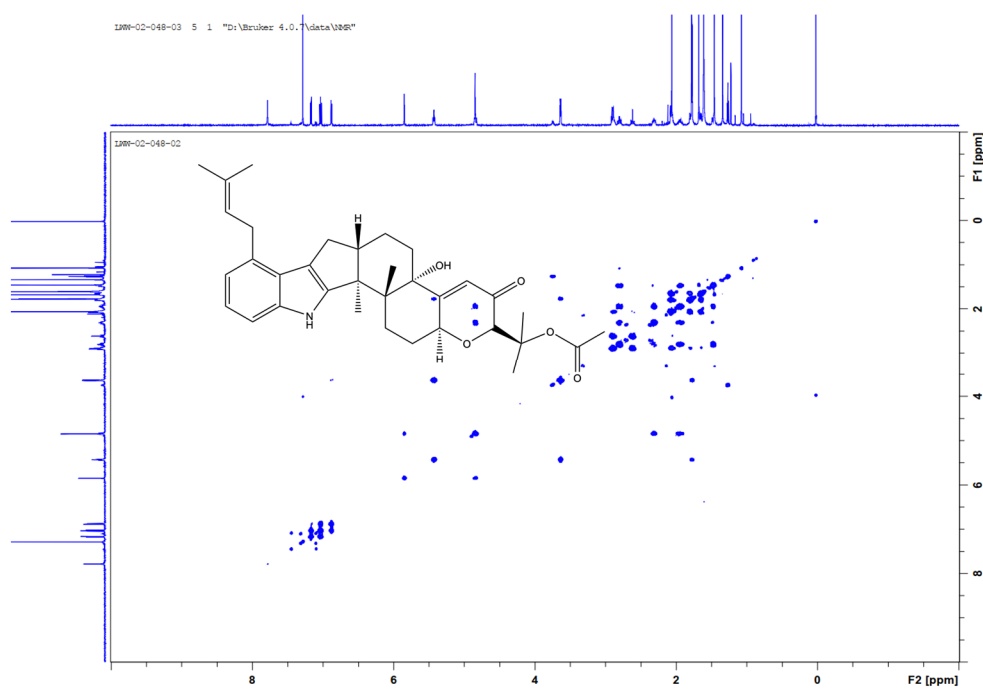

Figure S16. HMBC spectrum of paxilline B (3)

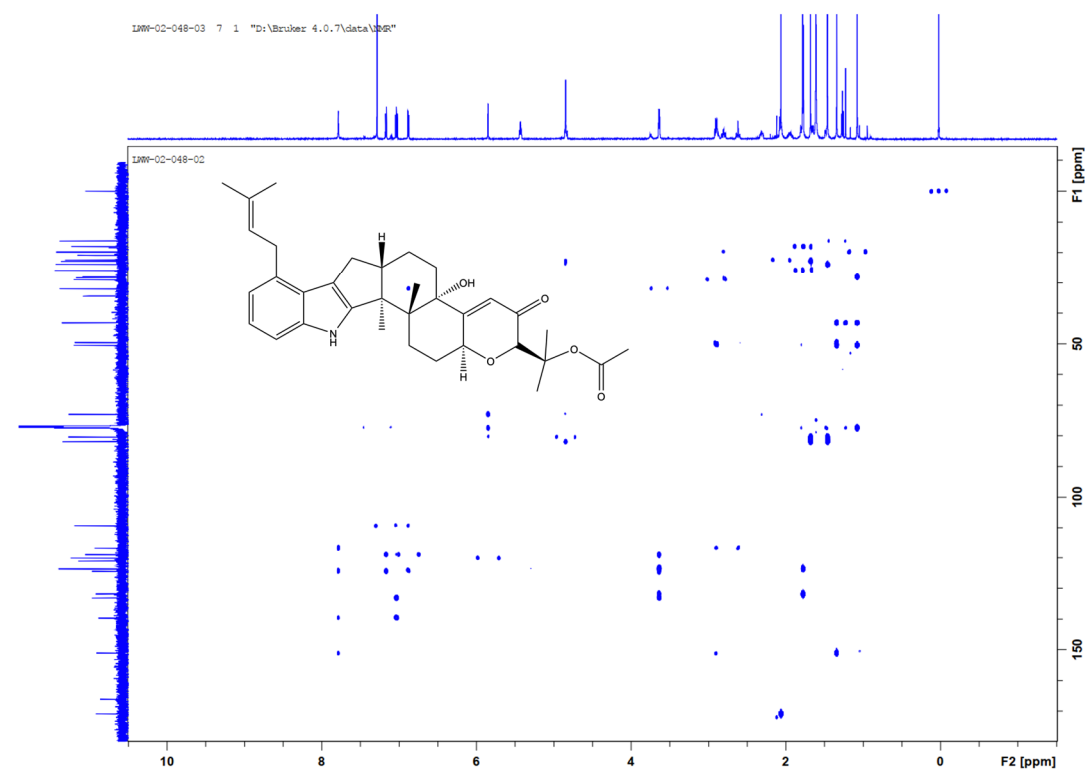

Figure S17.  $^1\text{H}$ - $^1\text{H}$  COSY spectrum of paxilline B (**3**)

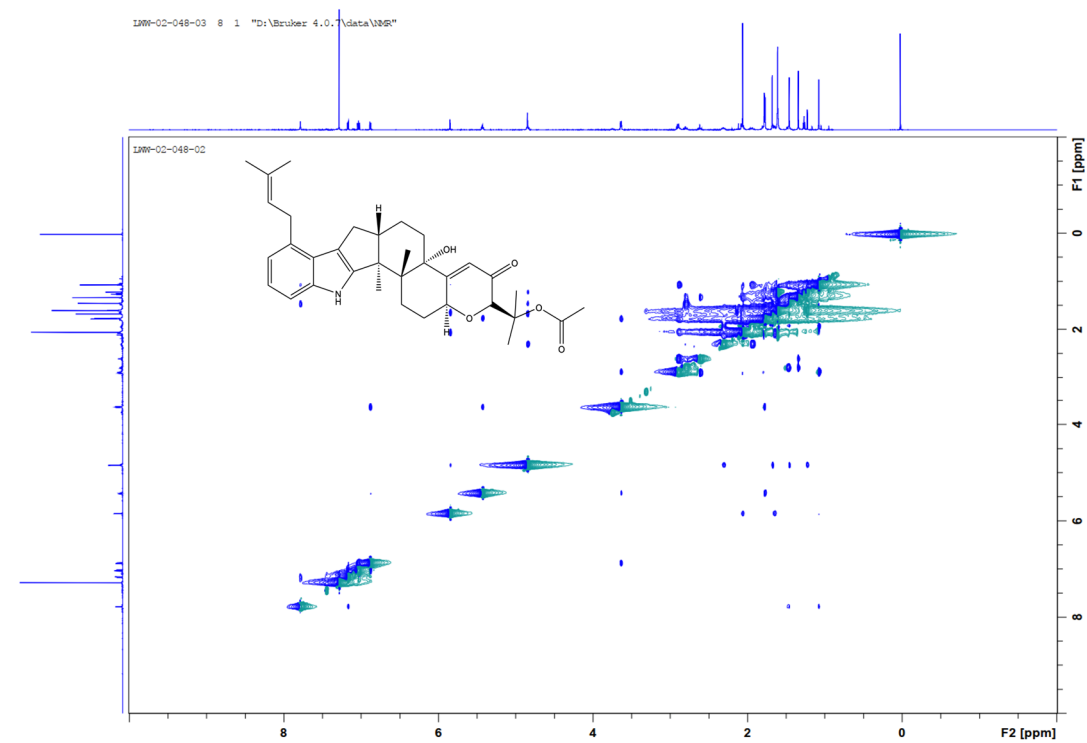

Figure S18. NOE spectrum of paxilline B (**3**)

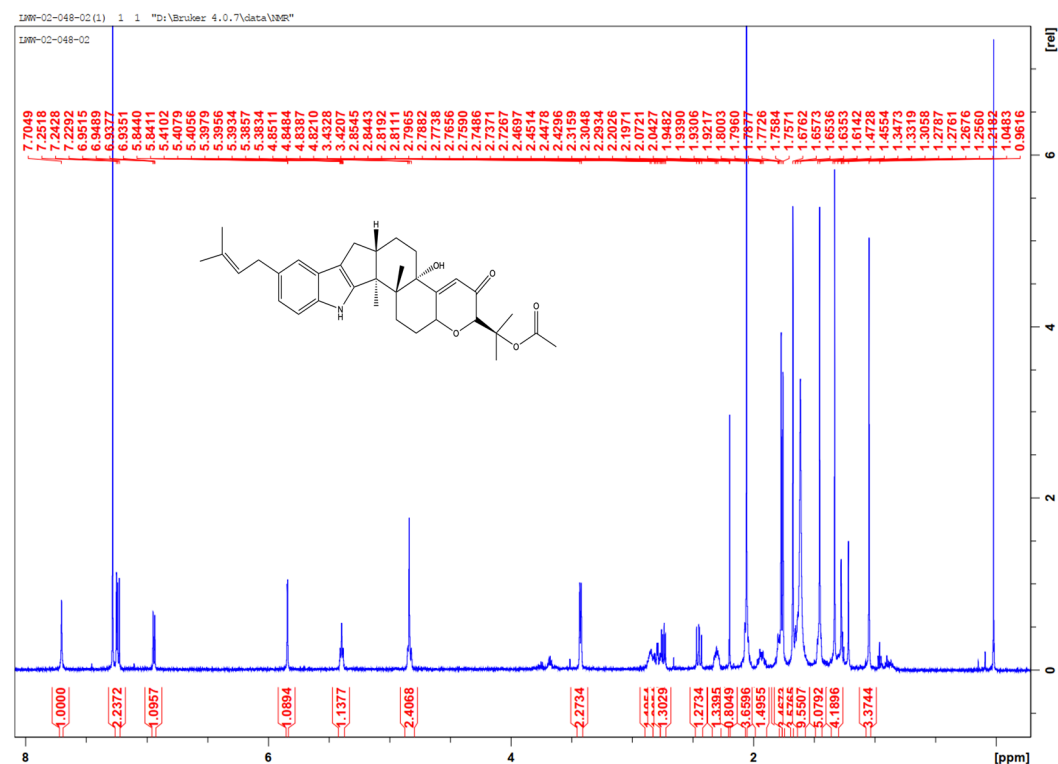

Figure S19. <sup>1</sup>H NMR (600 MHz, CDCl<sub>3</sub>) spectrum of paxilline C (4)

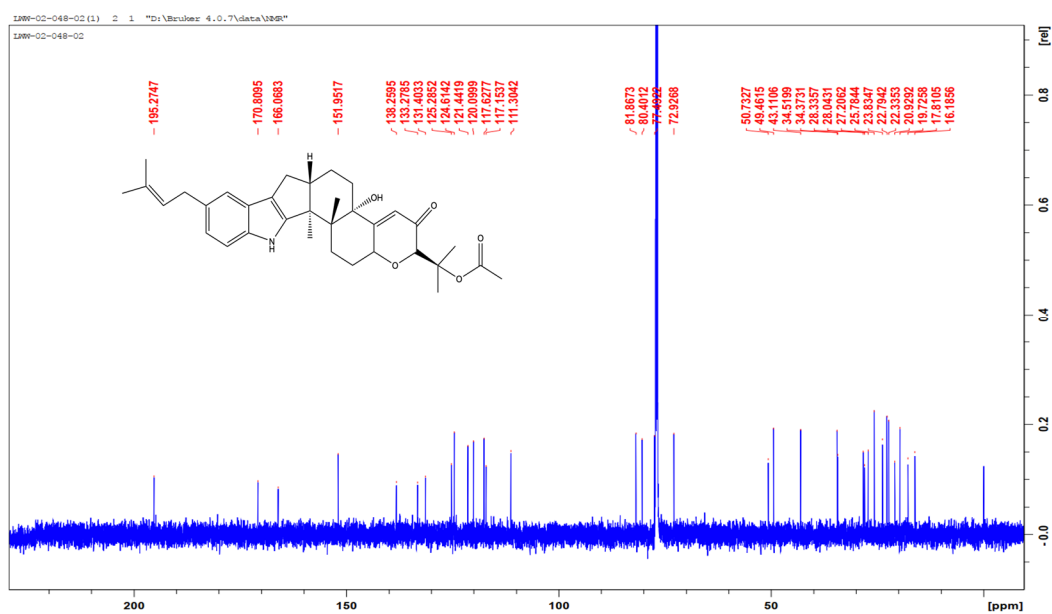

Figure S20. <sup>13</sup>C NMR (150 MHz, CDCl<sub>3</sub>) spectrum of paxilline C (4)

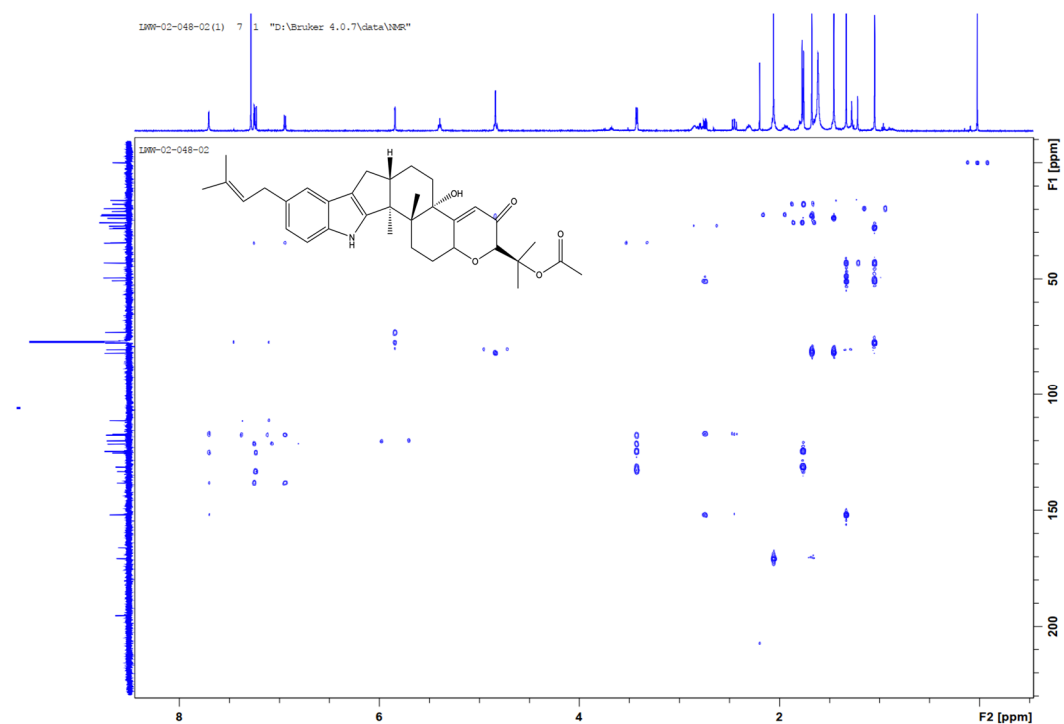

Figure S21. HSQC spectrum of paxilline C (4)

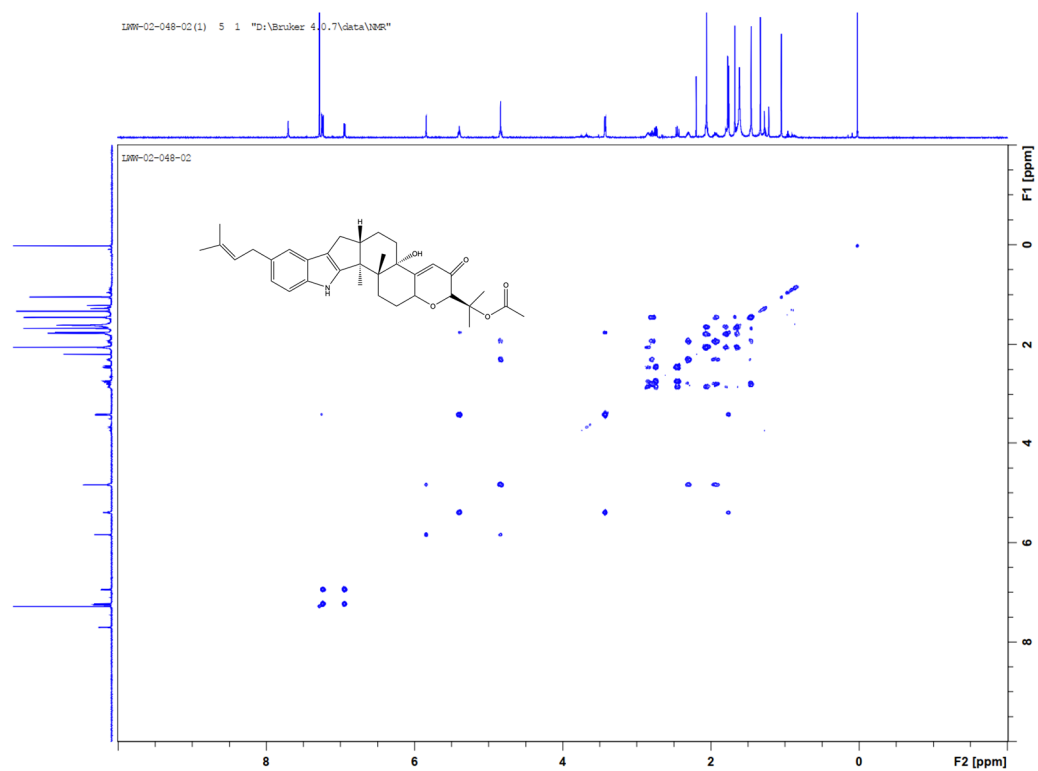

Figure S22. HMBC spectrum of paxilline C (4)

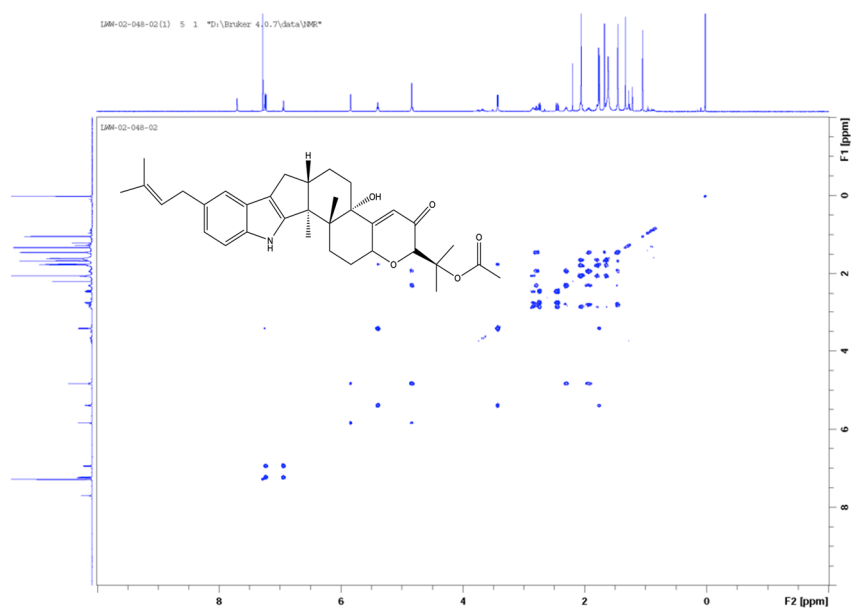

Figure S23.  $^1\text{H}$ - $^1\text{H}$  COSY spectrum of paxilline C (4)

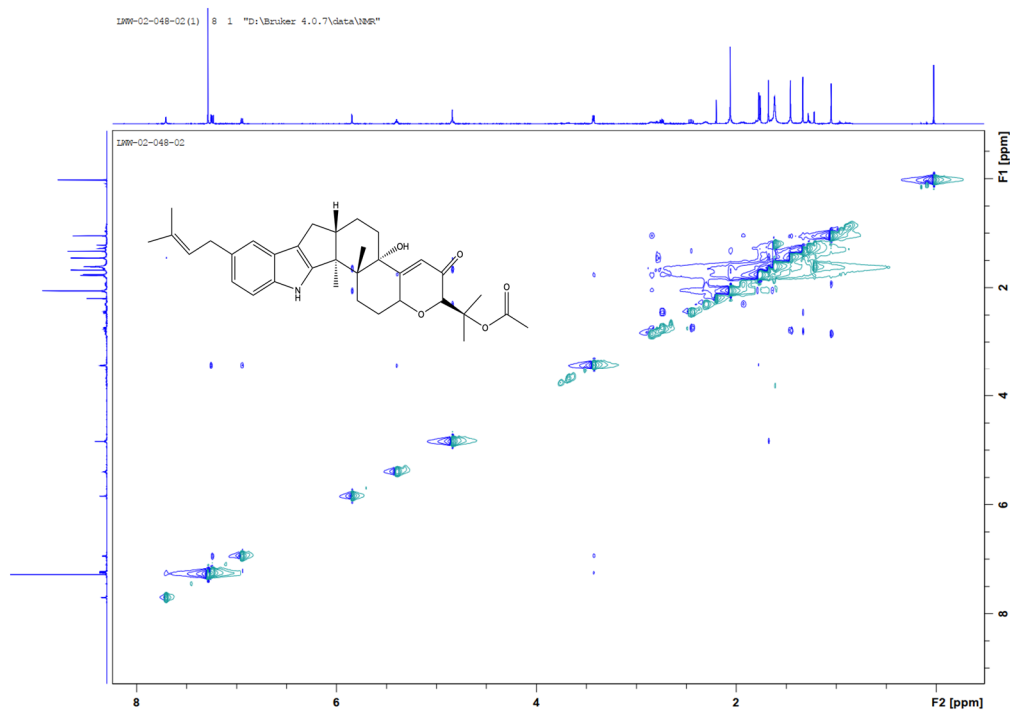

Figure S24. NOE spectrum of paxilline C (4)

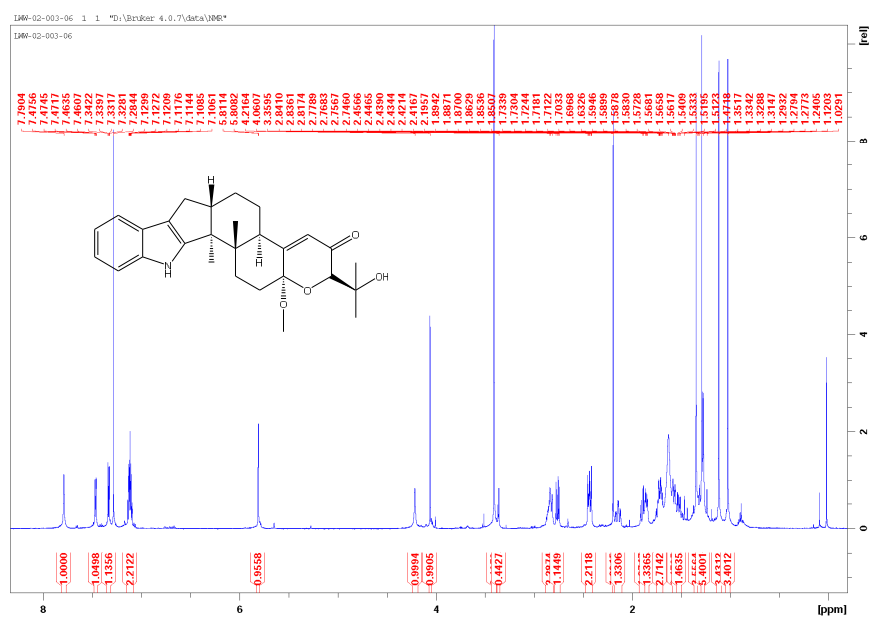

Figure S25. <sup>1</sup>H NMR (600 MHz, CDCl<sub>3</sub>) spectrum of paxilline D (5)

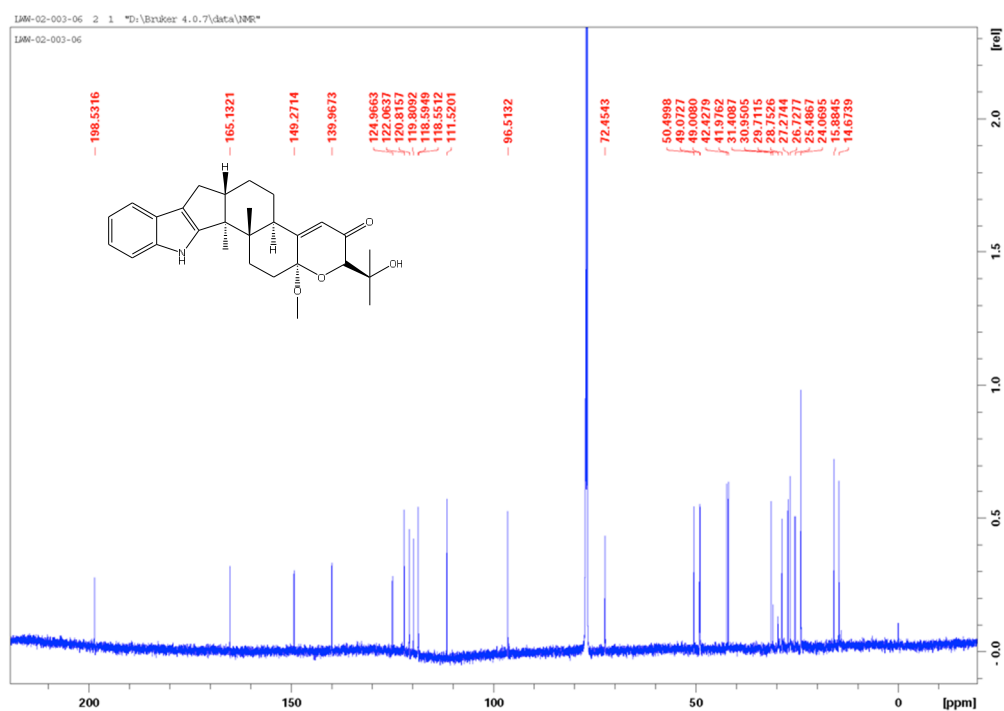

Figure S26. <sup>13</sup>C NMR (150 MHz, CDCl<sub>3</sub>) spectrum of paxilline D (5)

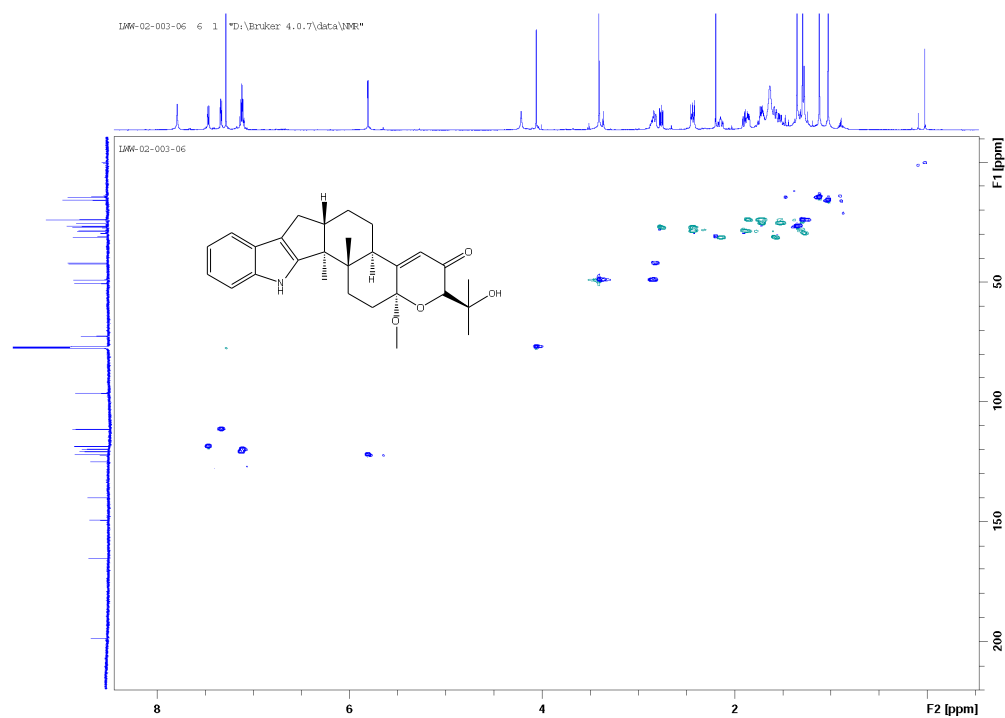

Figure S27. HSQC spectrum of paxilline D (5)

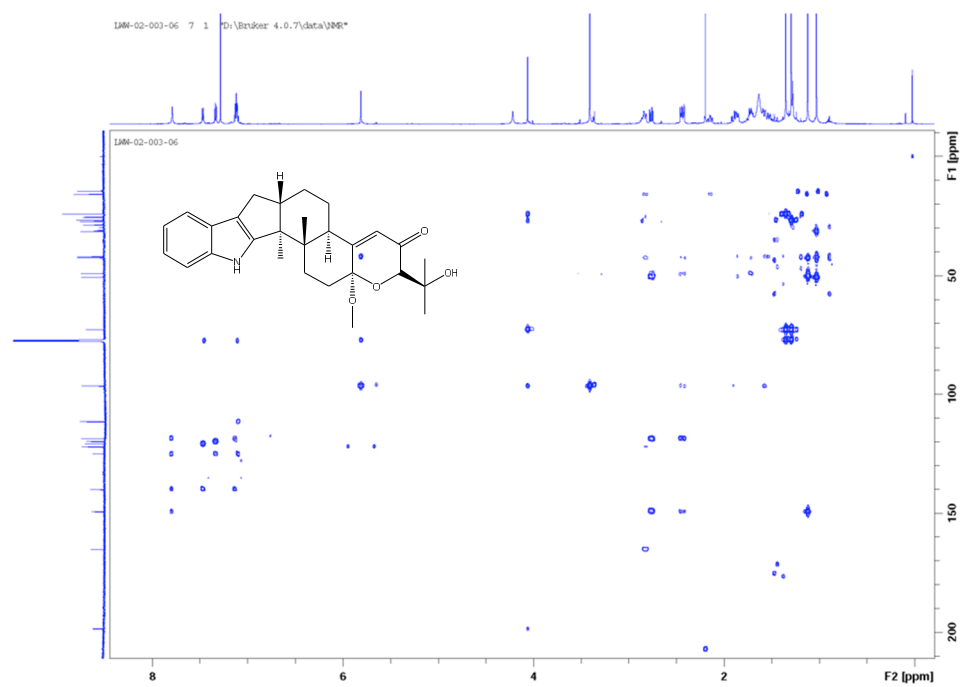

Figure S28. HMBC spectrum of paxilline D (5)

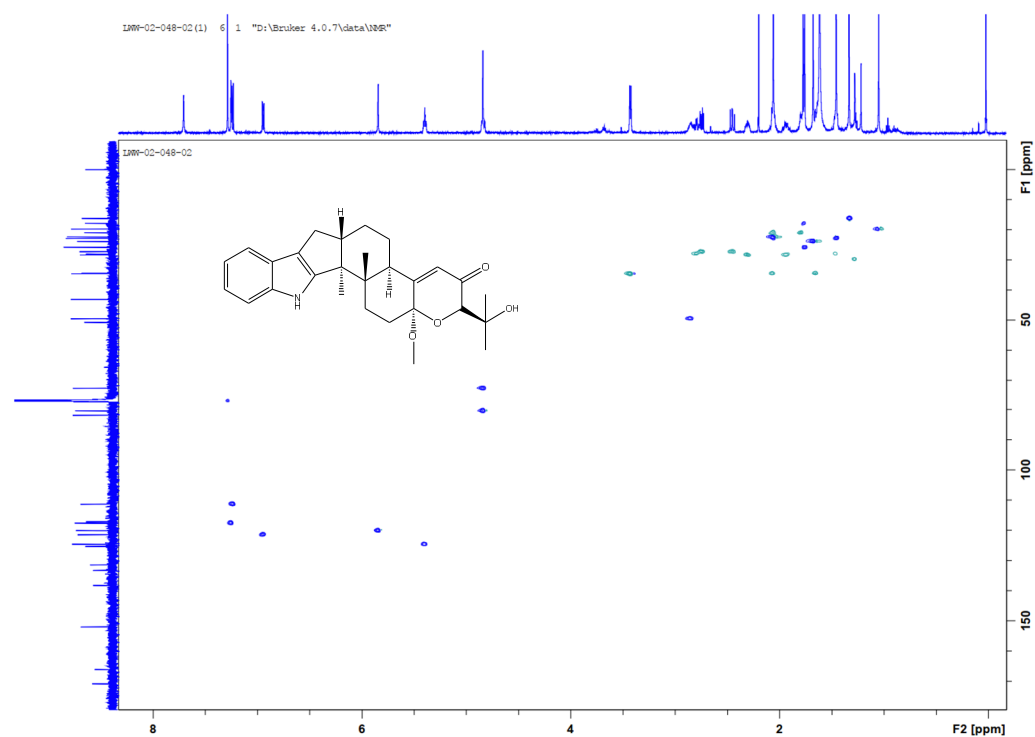

Figure S29.  $^1\text{H}$ - $^1\text{H}$  COSY spectrum of paxilline D (**5**)

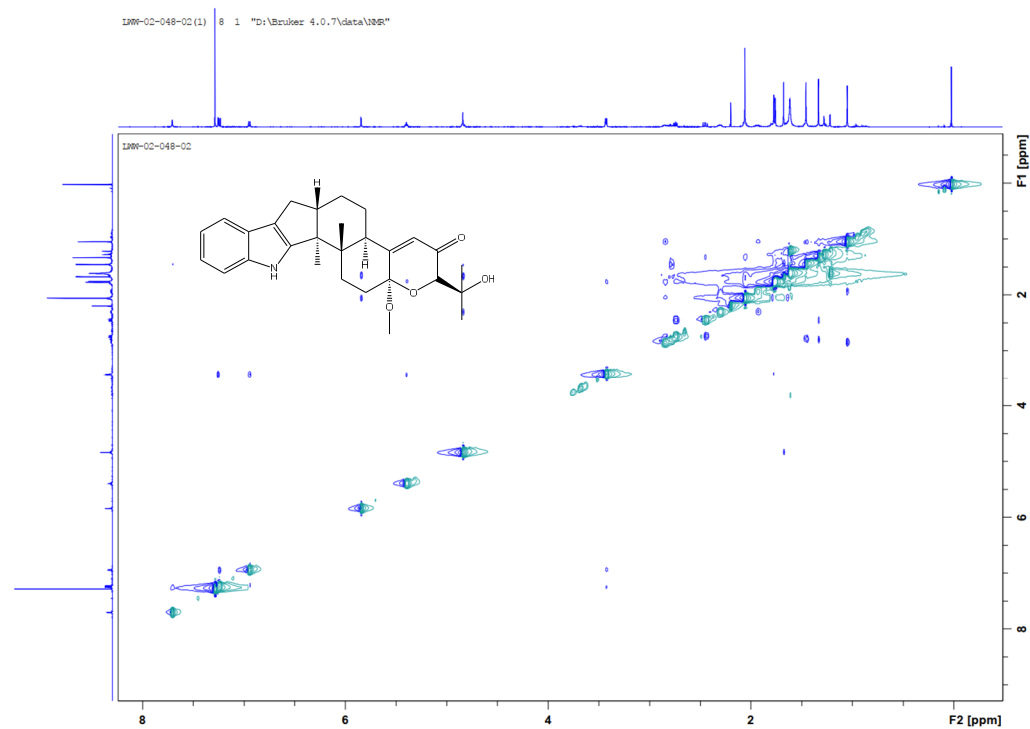

Figure S30. NOE spectrum of paxilline D (**5**)

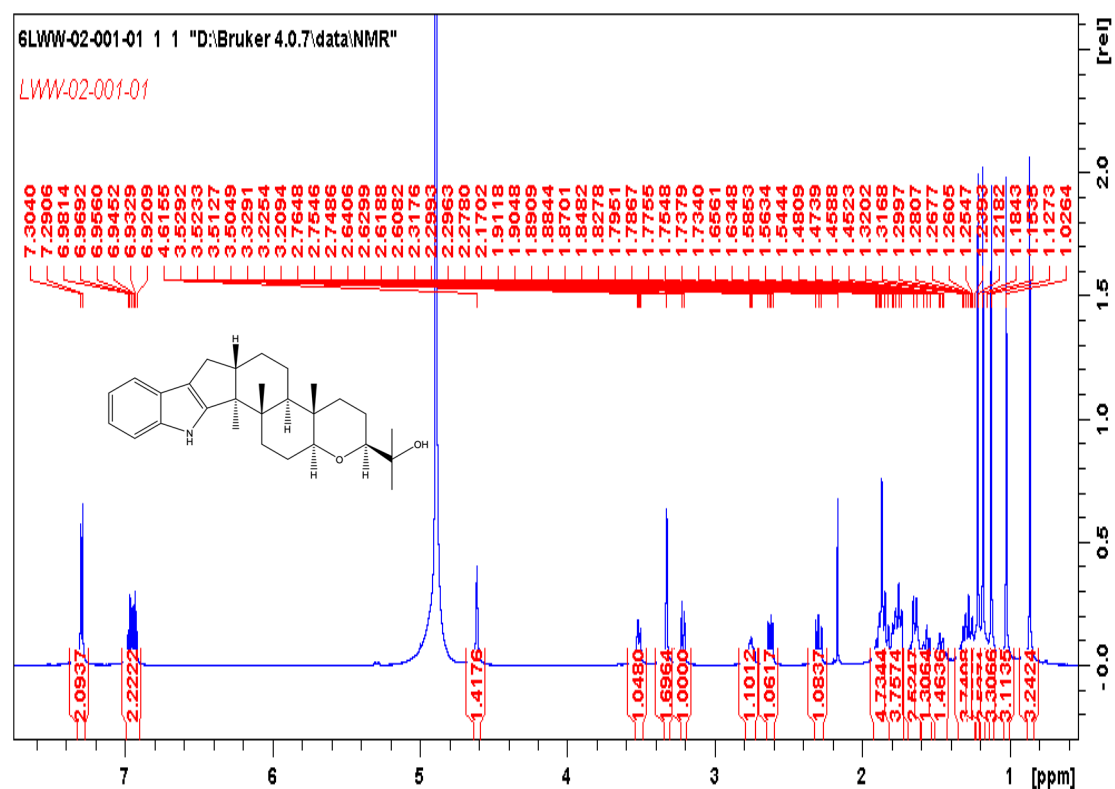

Figure S31.  $^1\text{H}$  NMR (600 MHz,  $\text{CDCl}_3$ ) spectrum of paspaline (6)

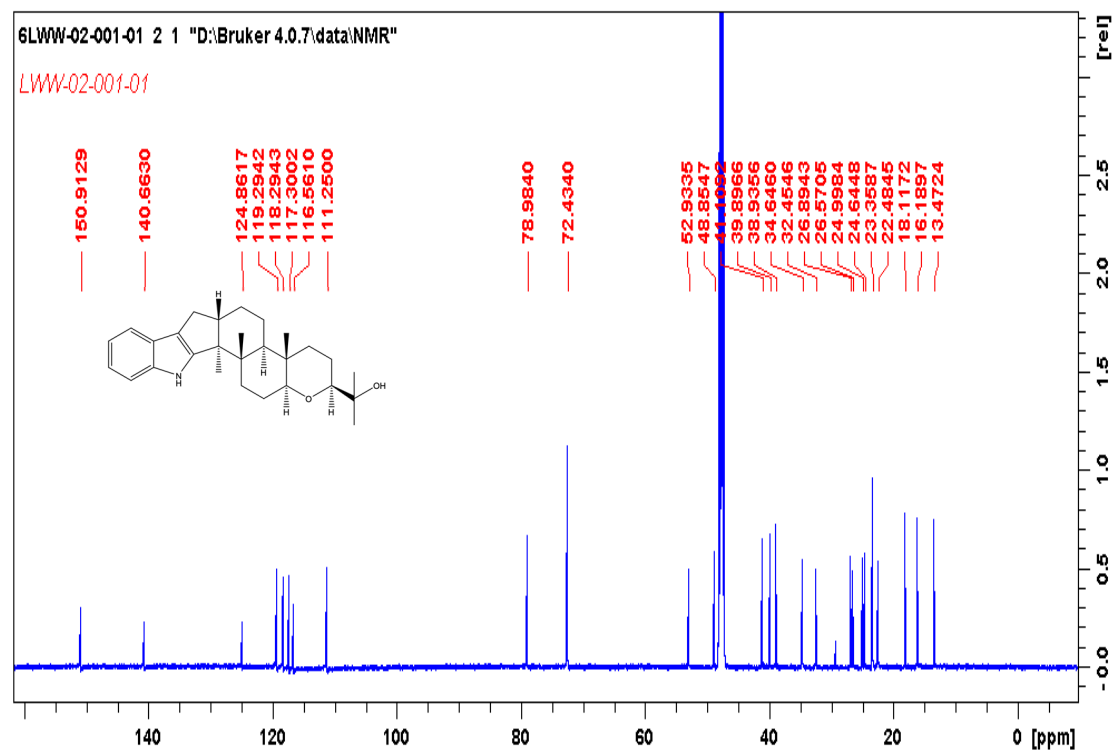

Figure S32.  $^{13}\text{C}$  NMR (150 MHz,  $\text{CDCl}_3$ ) spectrum of paspaline (6)

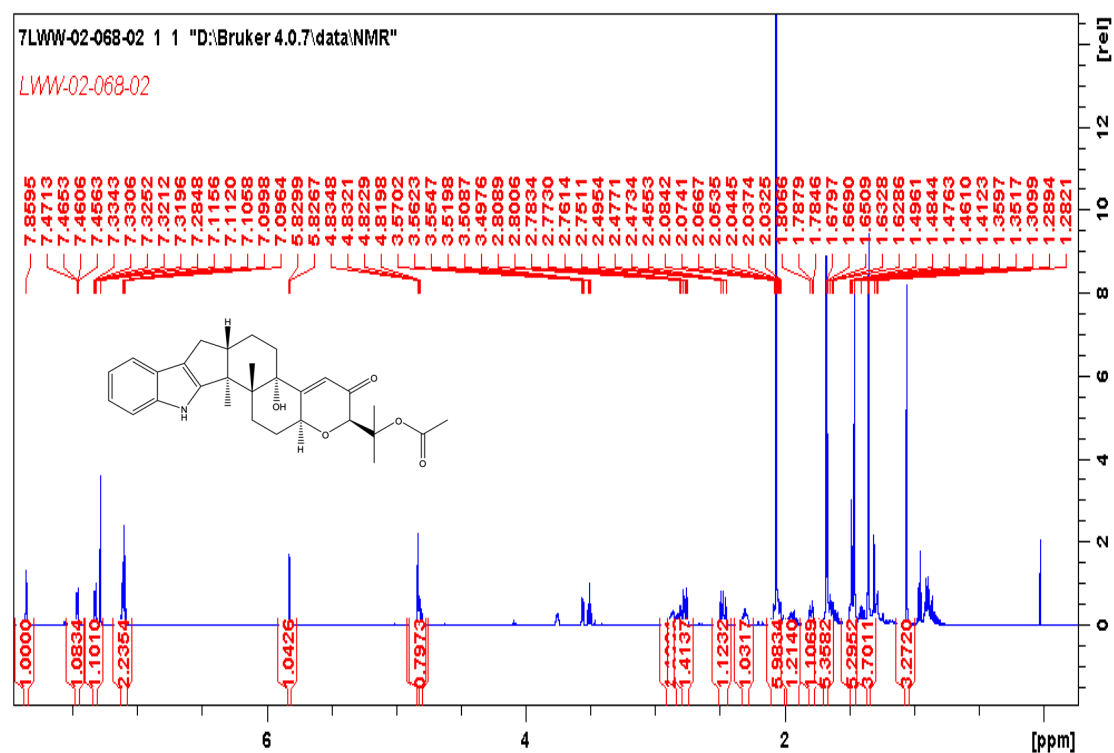

Figure S33.  $^1\text{H}$  NMR (600 MHz,  $\text{CDCl}_3$ ) spectrum of 1'-O-acetyl paxilline (7)

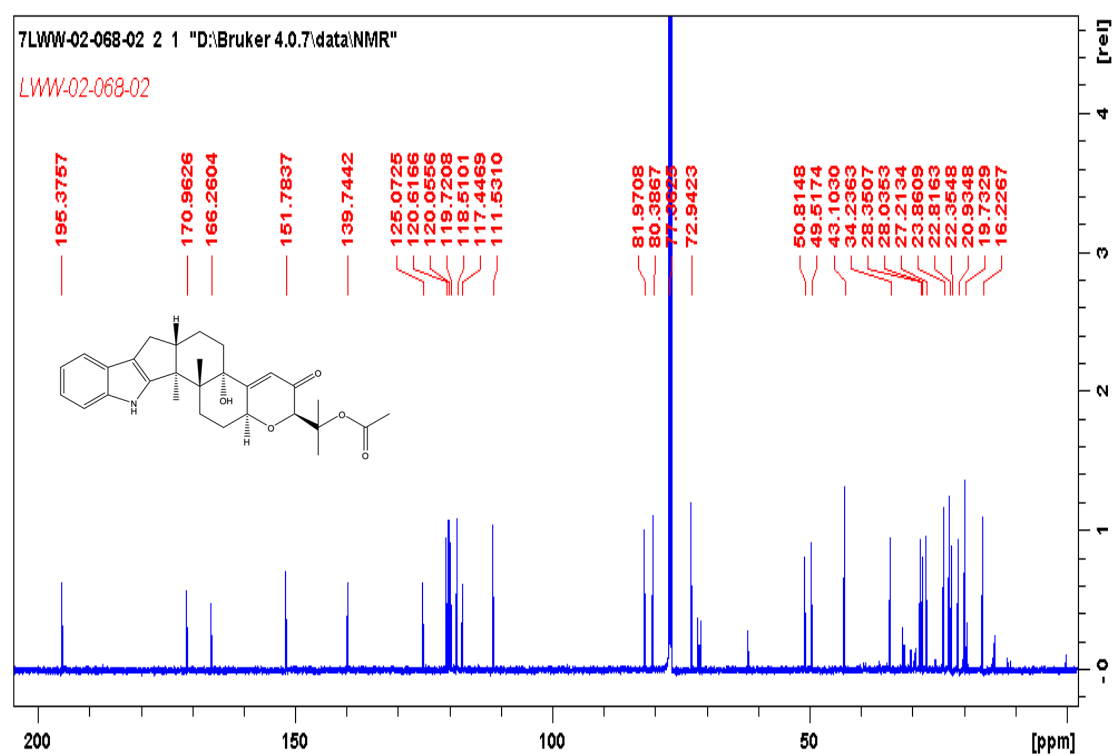

Figure S34.  $^{13}\text{C}$  NMR (150 MHz,  $\text{CDCl}_3$ ) spectrum of 1'-O-acetyl paxilline (7)

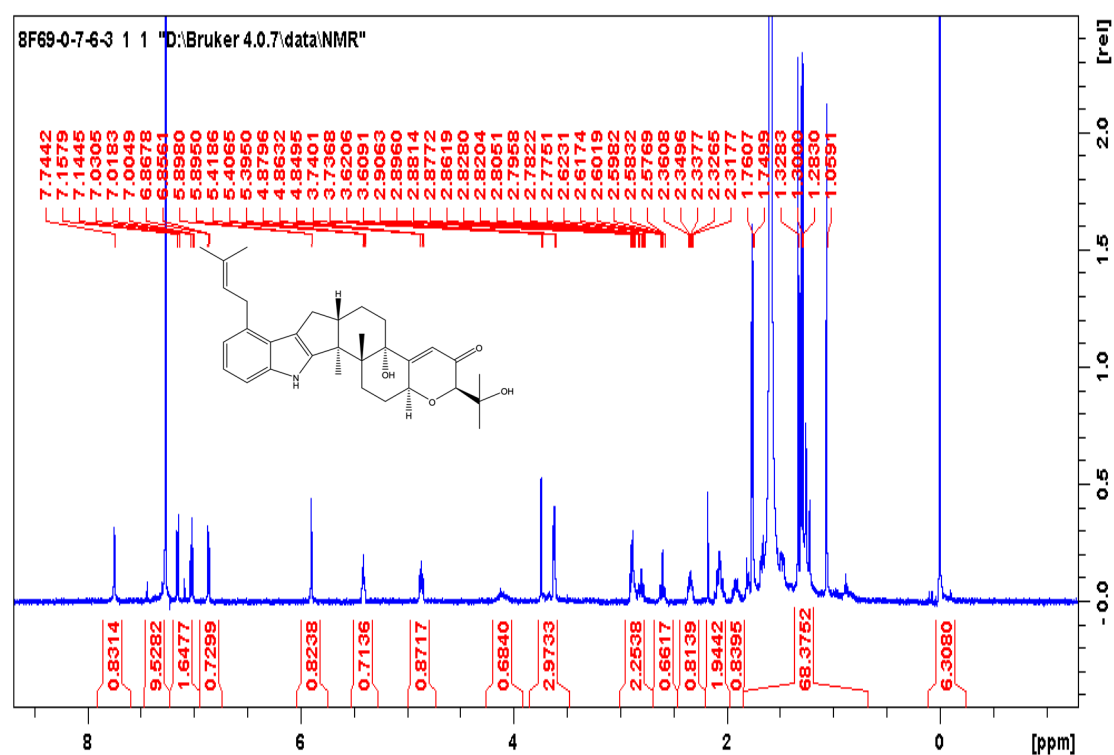

Figure S35.  $^1\text{H}$  NMR (600 MHz,  $\text{CDCl}_3$ ) spectrum of 20-prenylated paxilline (8)

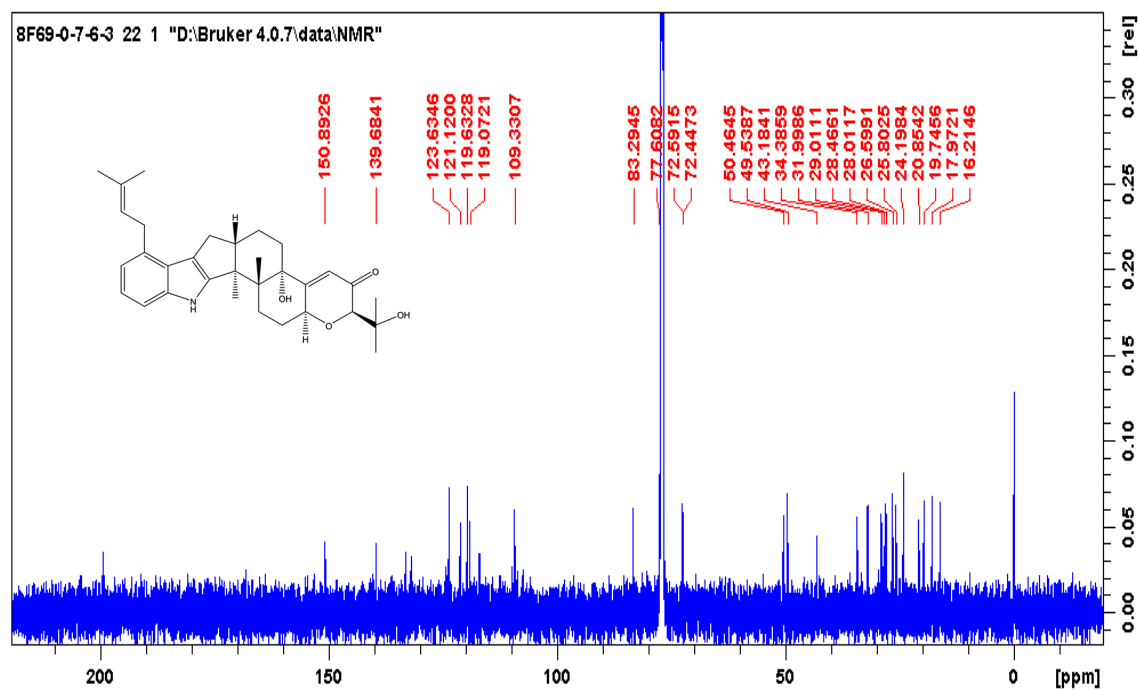

Figure S36.  $^{13}\text{C}$  NMR (150 MHz,  $\text{CDCl}_3$ ) spectrum of 20-prenylated paxilline (8)

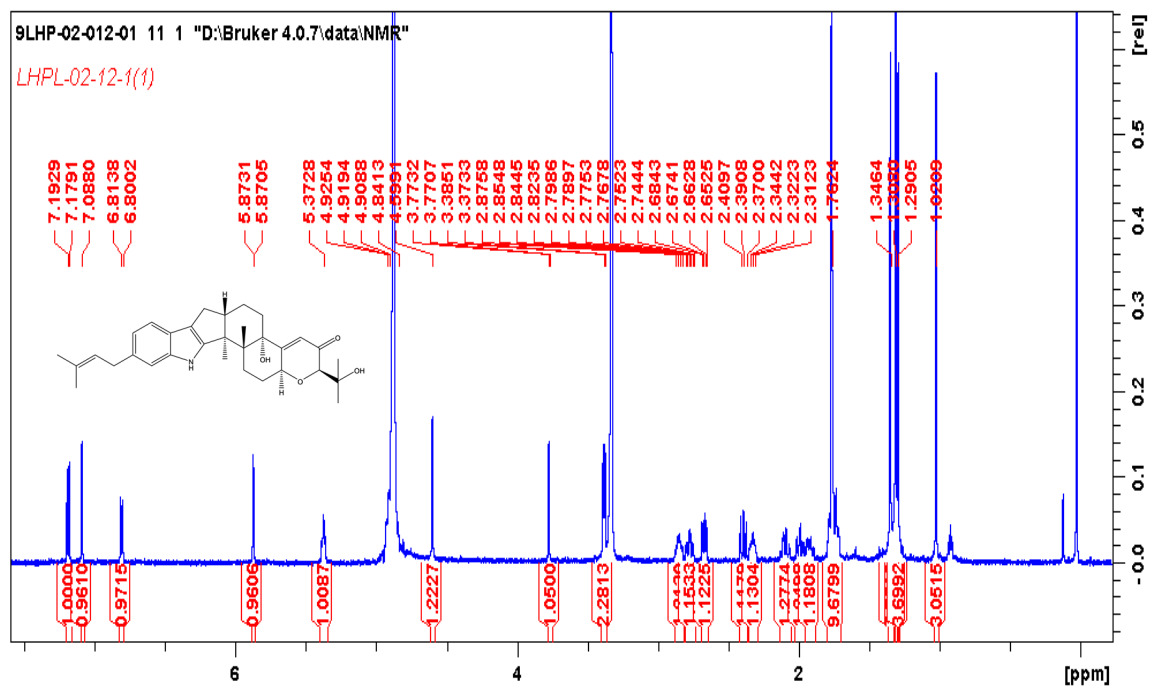

Figure S37.  $^1\text{H}$  NMR (600 MHz,  $\text{CDCl}_3$ ) spectrum of 22-prenylated paxilline (9)

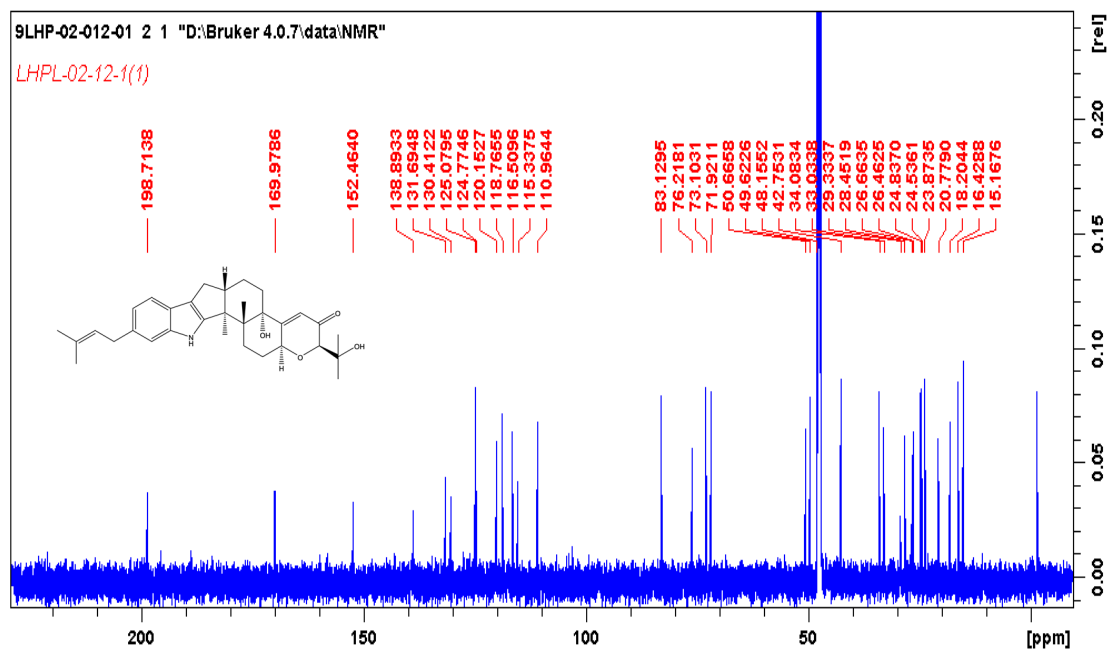

Figure S38.  $^{13}\text{C}$  NMR (150 MHz,  $\text{CDCl}_3$ ) spectrum of 22-prenylated paxilline (9)

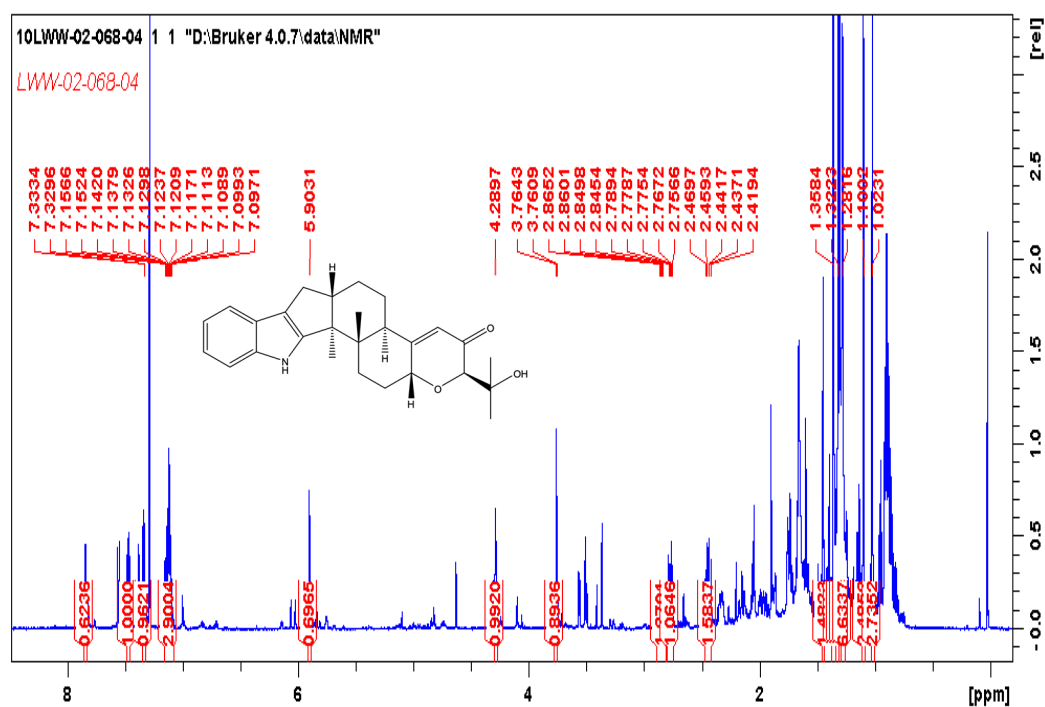

Figure S39.  $^1\text{H}$  NMR (600 MHz,  $\text{CDCl}_3$ ) spectrum of 13-deoxy-paxilline (**10**)

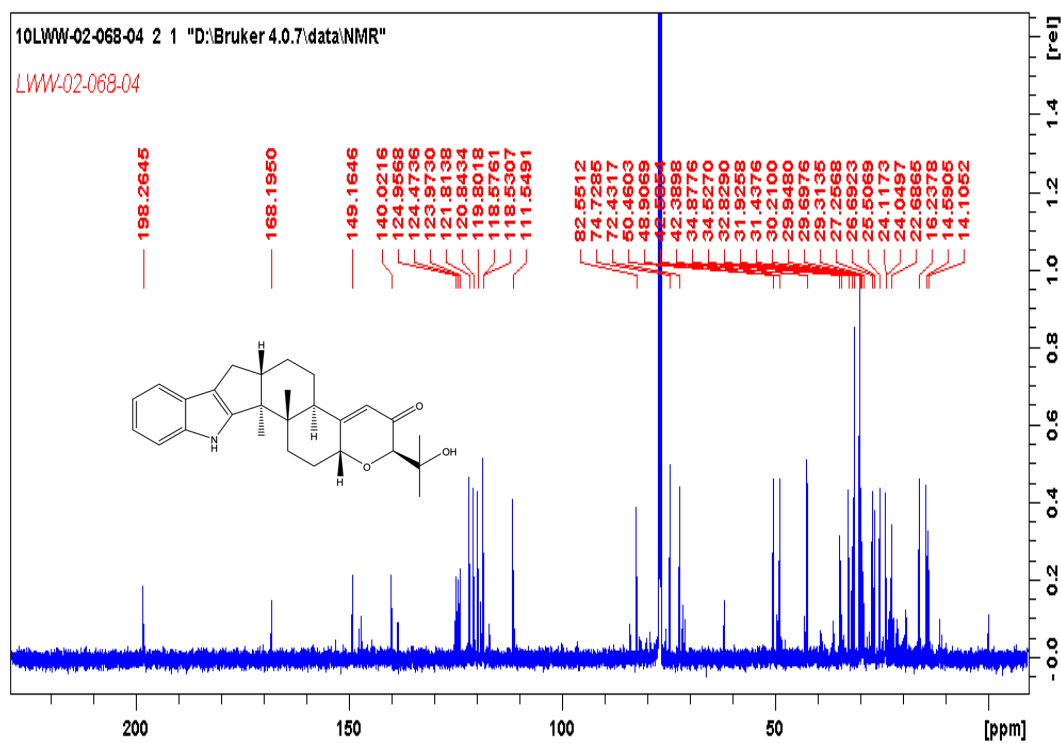

Figure S40.  $^{13}\text{C}$  NMR (150 MHz,  $\text{CDCl}_3$ ) spectrum of 13-deoxy-paxilline (**10**)

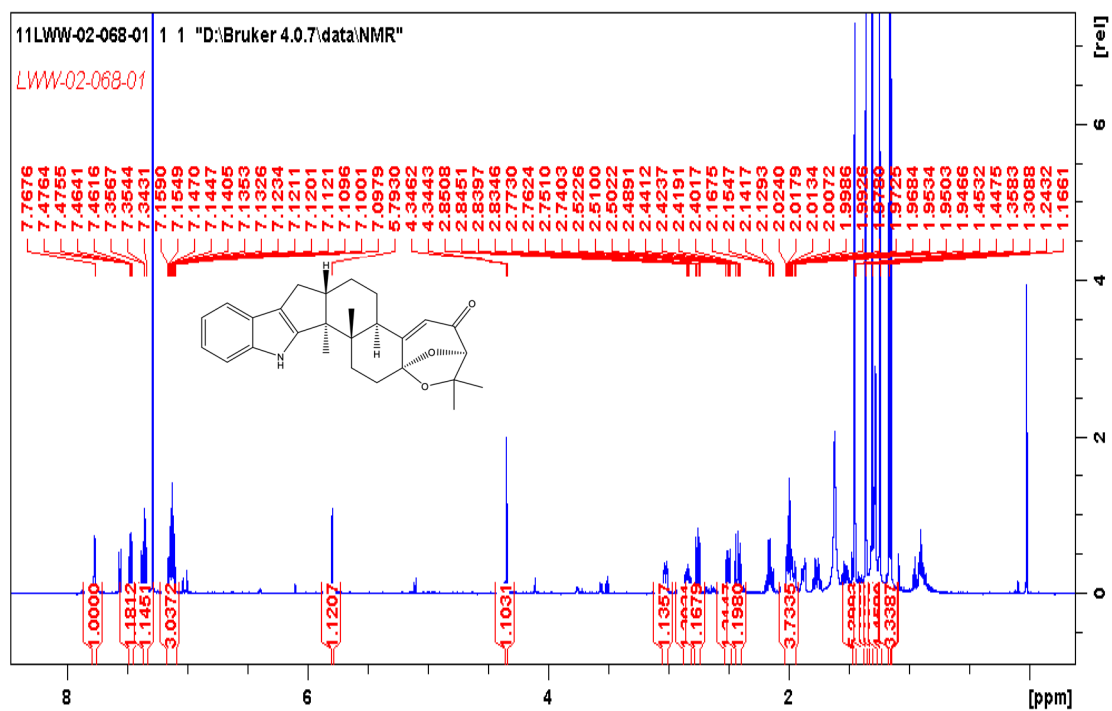

Figure S41.  $^1\text{H}$  NMR (600 MHz,  $\text{CDCl}_3$ ) spectrum of paspalicine (11)

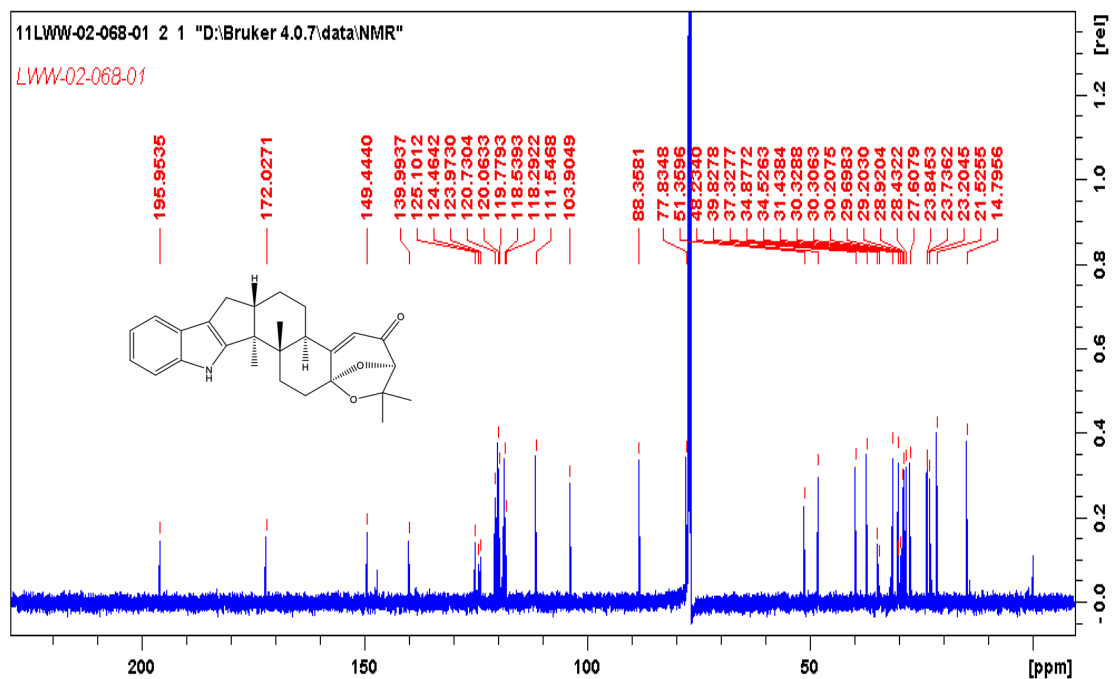

Figure S42.  $^{13}\text{C}$  NMR (150 MHz,  $\text{CDCl}_3$ ) spectrum of paspalicine (11)

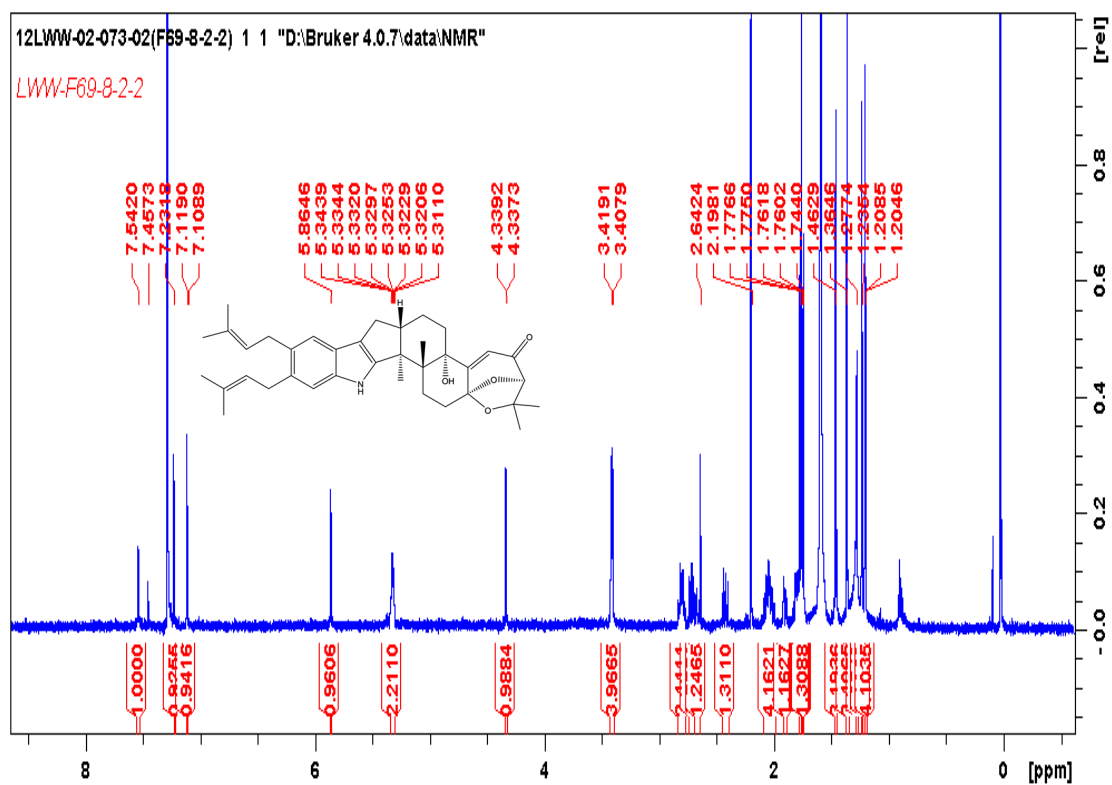

Figure S43.  $^1\text{H}$  NMR (600 MHz,  $\text{CDCl}_3$ ) spectrum of sherinine K (**12**)

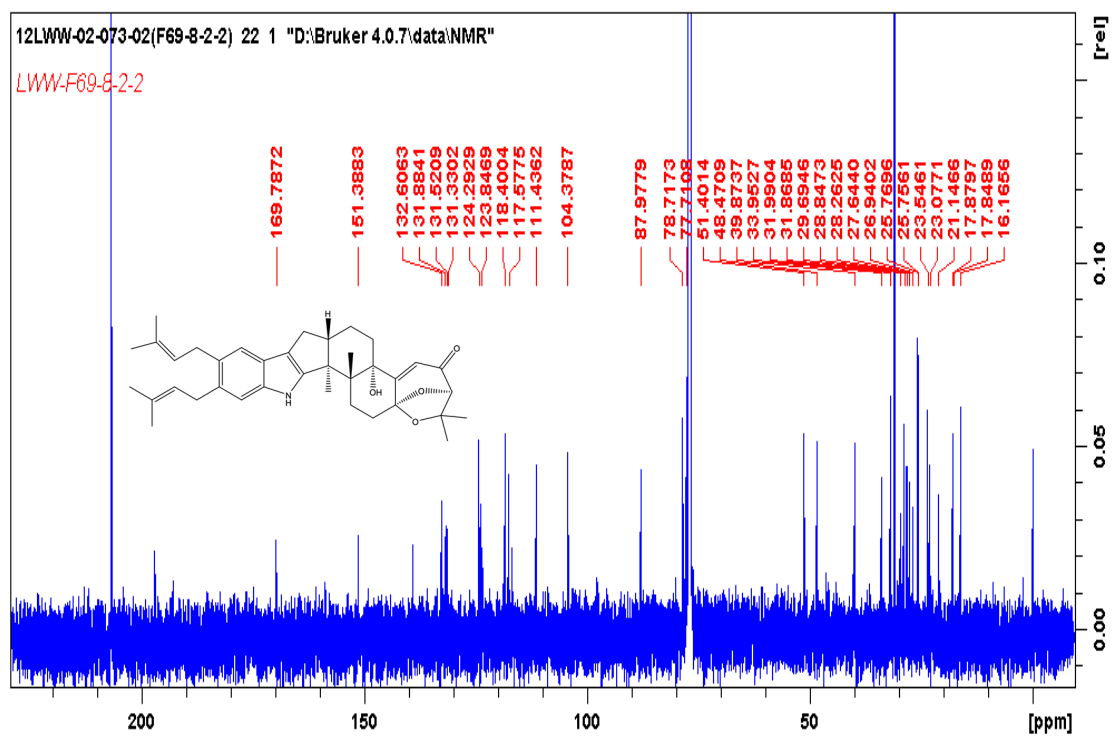

Figure S44.  $^{13}\text{C}$  NMR (150 MHz,  $\text{CDCl}_3$ ) spectrum of sherinine K (**12**)

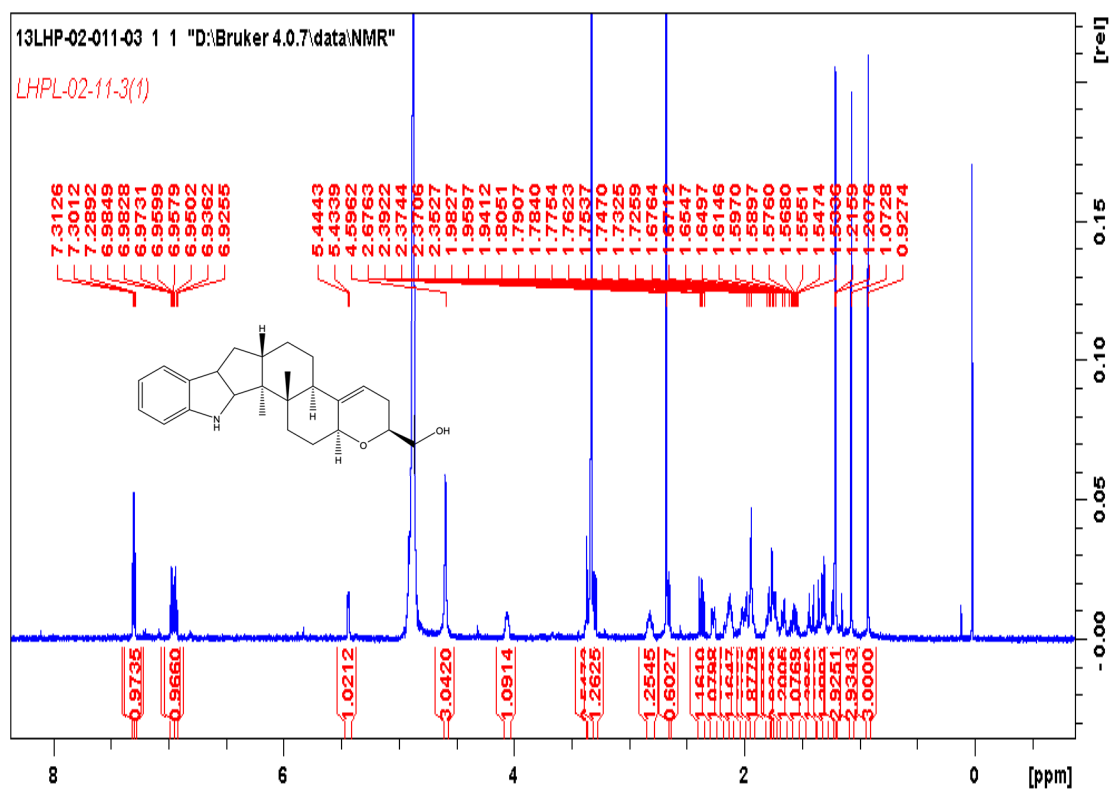

Figure S45.  $^1\text{H}$ NMR (600 MHz,  $\text{CDCl}_3$ ) spectrum of 3-deoxo-4b-deoxy paxillin  
(13)

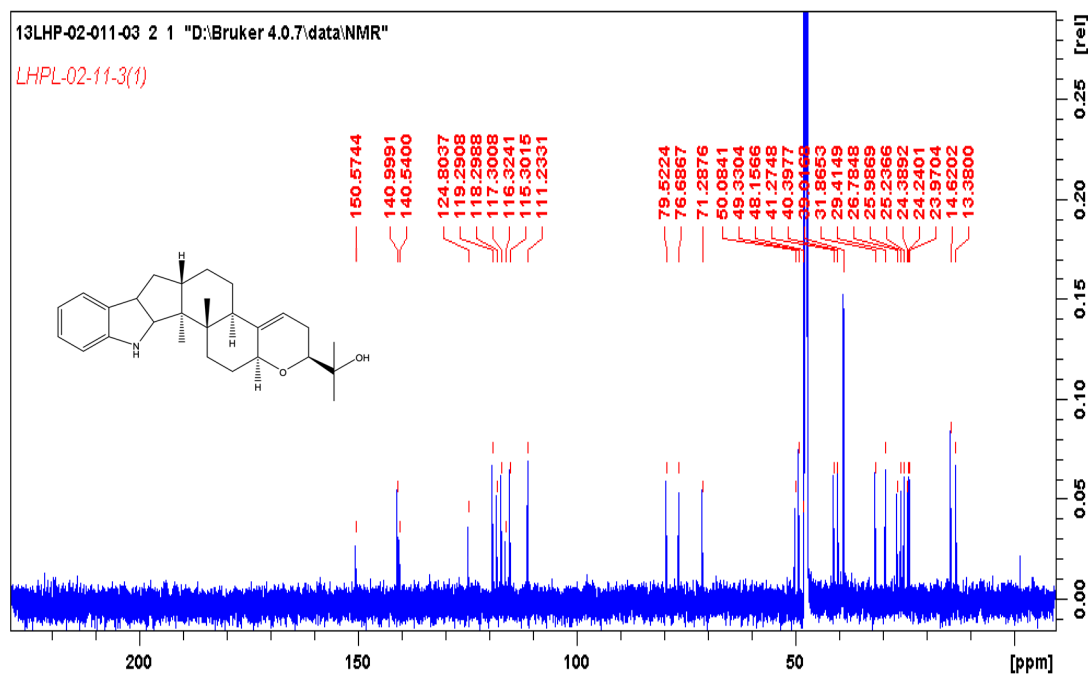

Figure S46.  $^{13}\text{C}$  NMR (150 MHz,  $\text{CDCl}_3$ ) spectrum of 3-deoxo- 4b-deoxy paxilline  
(13)



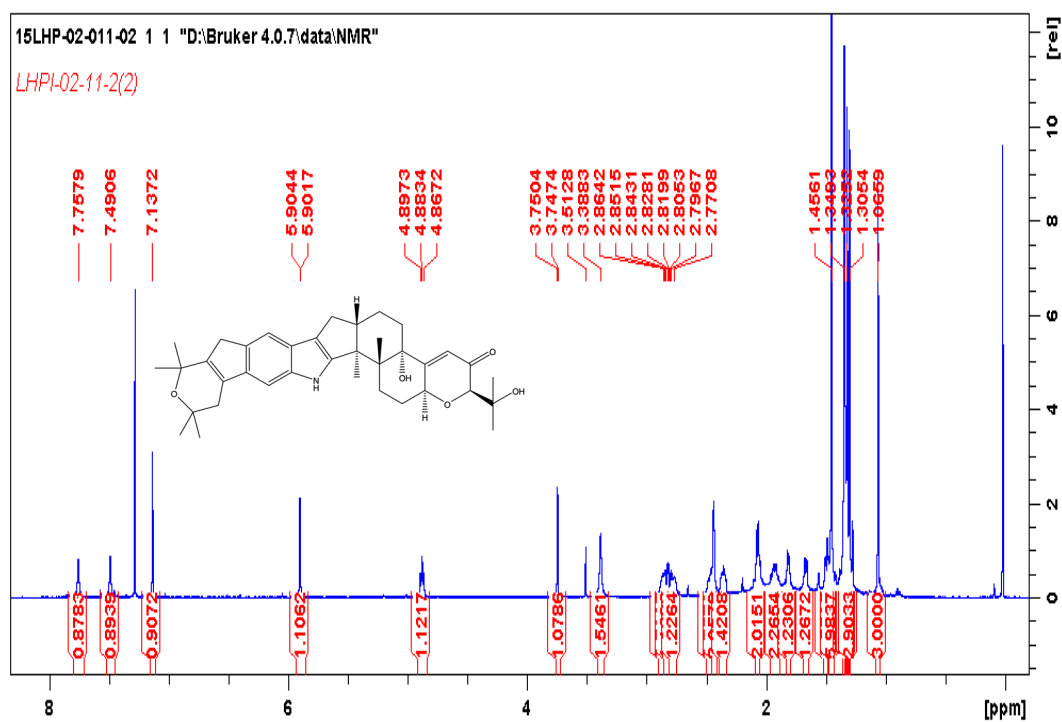

Figure S49.  $^1\text{H}$  NMR (600 MHz,  $\text{CDCl}_3$ ) spectrum of pyrapaxilline (15)

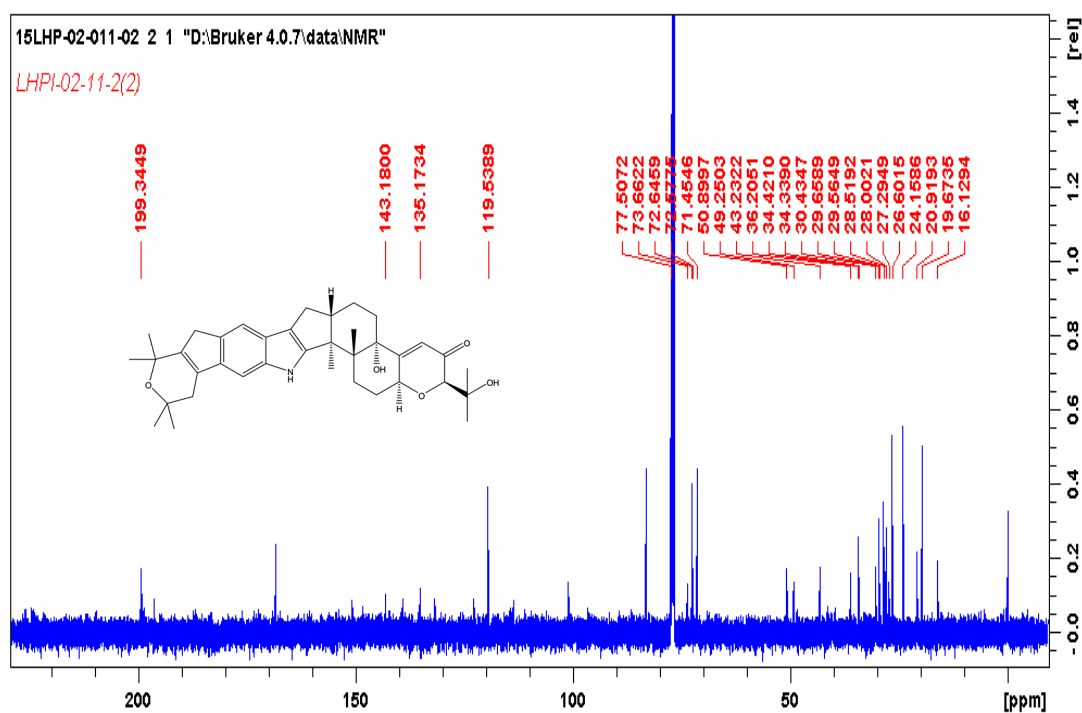

Figure S50.  $^{13}\text{C}$  NMR (150 MHz,  $\text{CDCl}_3$ ) spectrum of pyrapaxilline (15)

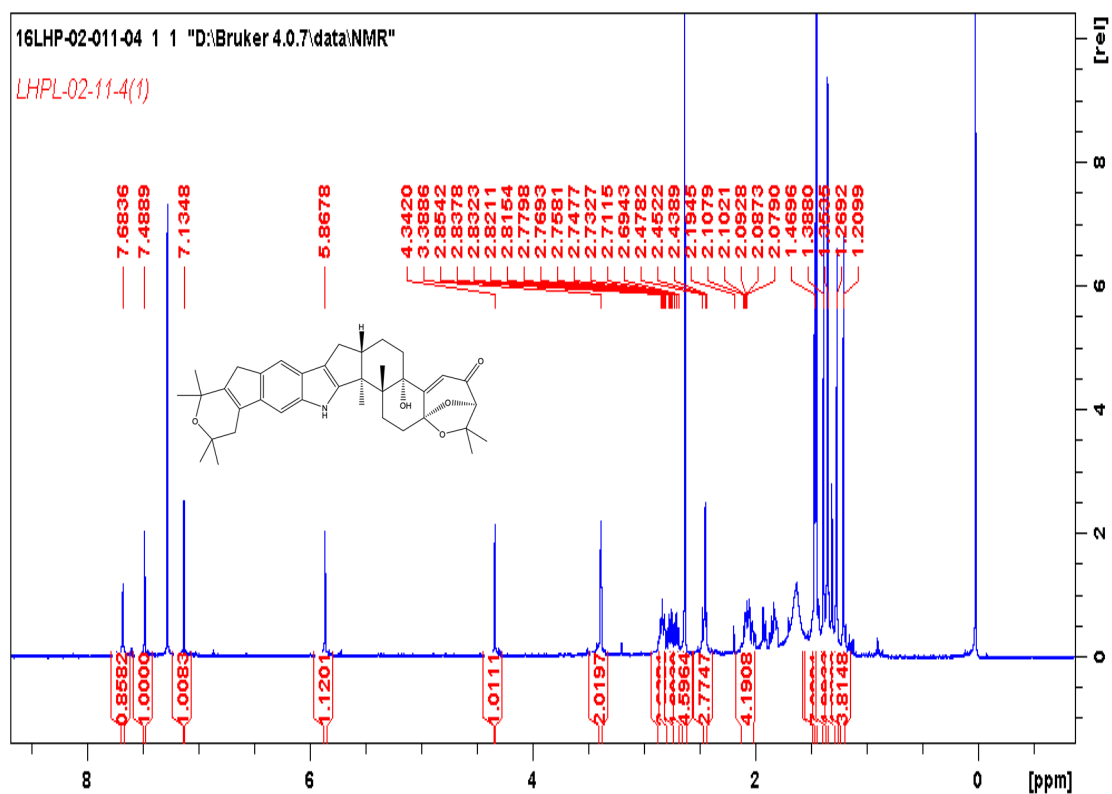

Figure S51.  $^1\text{H}$  NMR (600 MHz,  $\text{CDCl}_3$ ) spectrum of shearinine (**16**)

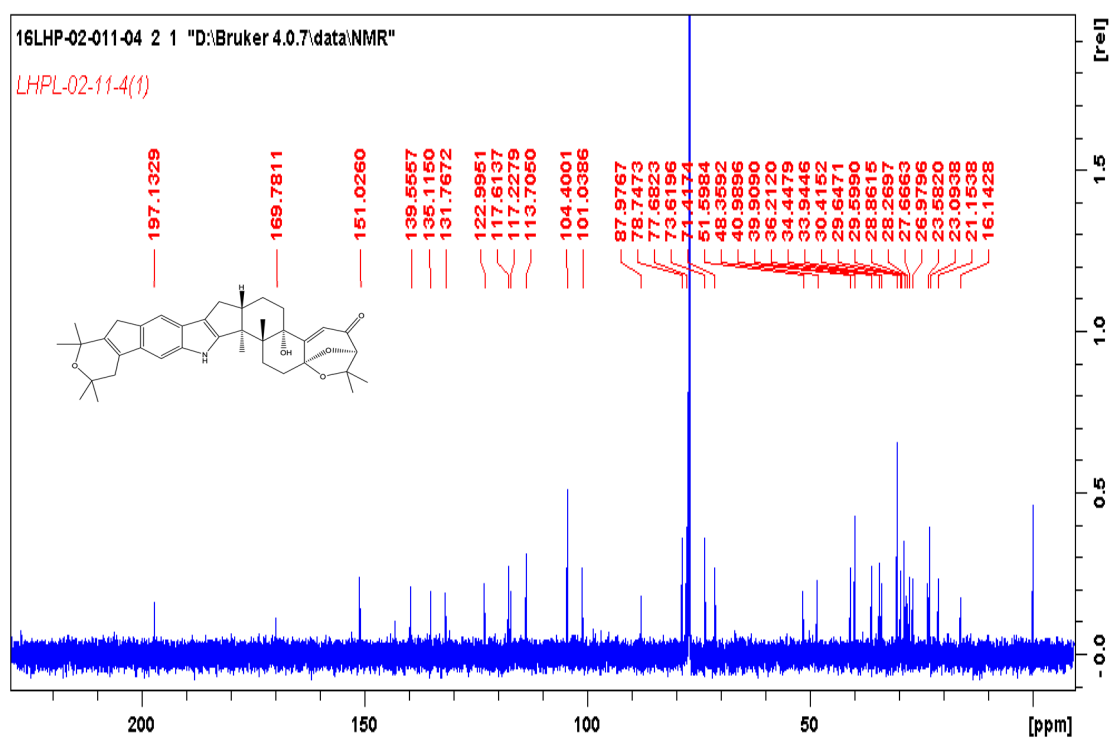

Figure S52.  $^{13}\text{C}$  NMR (150 MHz,  $\text{CDCl}_3$ ) spectrum of shearinine (**16**)

National Center for Organic Mass Spectrometry in Shanghai  
Shanghai Institute of Organic Chemistry  
Chinese Academic of Sciences  
High Resolution MS ESI REPORT

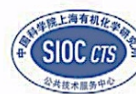

Instrument: Thermo Scientific Q Exactive HF Orbitrap-FTMS

Card Serial Number: H-W190566

Sample Serial Number: LWW-02-049-03

Operator: QHL Date: 2019/06/25

Operation Mode: ESI Positive Ion Mode

Elemental composition search on mass 480.35

m/z= 475.35-485.35

| m/z      | Theo.<br>Mass | Delta<br>(ppm) | RDB<br>equiv. | Composition                                                     |
|----------|---------------|----------------|---------------|-----------------------------------------------------------------|
| 480.3474 | 480.3472      | 0.33           | 9.5           | C <sub>31</sub> H <sub>46</sub> O <sub>3</sub> N                |
|          | 480.3479      | -1.11          | 0.0           | C <sub>25</sub> H <sub>52</sub> O <sub>6</sub> S                |
|          | 480.3466      | 1.69           | 0.5           | C <sub>23</sub> H <sub>50</sub> O <sub>5</sub> N <sub>3</sub> S |
|          | 480.3459      | 3.13           | 10.0          | C <sub>29</sub> H <sub>44</sub> O <sub>2</sub> N <sub>4</sub>   |
|          | 480.3492      | -3.89          | 5.0           | C <sub>26</sub> H <sub>48</sub> O <sub>2</sub> N <sub>4</sub> S |

Figure S53. HR-ESI-MS data report of paspaline C (1)

National Center for Organic Mass Spectrometry in Shanghai  
Shanghai Institute of Organic Chemistry  
Chinese Academic of Sciences  
High Resolution MS ESI REPORT

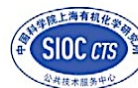

Instrument: Thermo Scientific Q Exactive HF Orbitrap-FTMS

Card Serial Number: H-W190558

Sample Serial Number: LWW-01-139-01

Operator: QHL Date: 2019/06/25

Operation Mode: ESI Positive Ion Mode

Elemental composition search on mass 504.31

m/z= 499.31-509.31

| m/z      | Theo.<br>Mass | Delta<br>(ppm) | RDB<br>equiv. | Composition                                         |
|----------|---------------|----------------|---------------|-----------------------------------------------------|
| 504.3087 | 504.3084      | 0.58           | 9.5           | C <sub>30</sub> H <sub>43</sub> O <sub>4</sub> N Na |
|          | 504.3082      | 1.12           | 8.0           | C <sub>29</sub> H <sub>44</sub> O <sub>7</sub>      |
|          | 504.3108      | -4.19          | 12.5          | C <sub>32</sub> H <sub>42</sub> O <sub>4</sub> N    |

Figure S54. HR-ESI-MS data report of paspaline D (2)

National Center for Organic Mass Spectrometry in Shanghai  
Shanghai Institute of Organic Chemistry  
Chinese Academic of Sciences  
High Resolution MS ESI REPORT

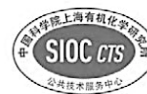

Instrument: Thermo Scientific Q Exactive HF Orbitrap-FTMS

Card Serial Number: H-W190564

Sample Serial Number: LWW-02-048-03

Operator: QHL Date: 2019/06/25

Operation Mode: ESI Positive Ion Mode

Elemental composition search on mass 546.32

| m/z= 541.32-551.32 |               |                |               |                                                               |
|--------------------|---------------|----------------|---------------|---------------------------------------------------------------|
| m/z                | Theo.<br>Mass | Delta<br>(ppm) | RDB<br>equiv. | Composition                                                   |
| 546.3217           | 546.3214      | 0.48           | 13.5          | C <sub>34</sub> H <sub>44</sub> O <sub>5</sub> N              |
|                    | 546.3227      | -1.97          | 18.5          | C <sub>35</sub> H <sub>40</sub> O N <sub>5</sub>              |
|                    | 546.3201      | 2.93           | 14.0          | C <sub>32</sub> H <sub>42</sub> O <sub>4</sub> N <sub>4</sub> |

Figure S55. HR-ESI-MS data report of paxilline B (3)

National Center for Organic Mass Spectrometry in Shanghai  
Shanghai Institute of Organic Chemistry  
Chinese Academic of Sciences  
High Resolution MS ESI REPORT

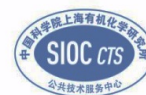

Instrument: Thermo Scientific Q Exactive HF Orbitrap-FTMS

Card Serial Number: H-W190562

Sample Serial Number: LWW-02-048-02

Operator: QHL Date: 2019/06/25

Operation Mode: ESI Positive Ion Mode

Elemental composition search on mass 546.32

m/z= 541.32-551.32

| m/z      | Theo.<br>Mass | Delta<br>(ppm) | RDB<br>equiv. | Composition                                                   |
|----------|---------------|----------------|---------------|---------------------------------------------------------------|
| 546.3220 | 546.3214      | 1.14           | 13.5          | C <sub>34</sub> H <sub>44</sub> O <sub>5</sub> N              |
|          | 546.3227      | -1.31          | 18.5          | C <sub>35</sub> H <sub>40</sub> ON <sub>5</sub>               |
|          | 546.3201      | 3.59           | 14.0          | C <sub>32</sub> H <sub>42</sub> O <sub>4</sub> N <sub>4</sub> |

Figure S56. HR-ESI-MS data report of paxilline C (4)

National Center for Organic Mass Spectrometry in Shanghai  
Shanghai Institute of Organic Chemistry  
Chinese Academic of Sciences  
High Resolution MS ESI REPORT

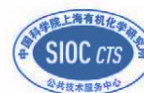

Instrument: Thermo Scientific Q Exactive HF Orbitrap-FTMS

Card Serial Number: H-W190560

Sample Serial Number: LWW-02-003-06

Operator: QHL Date: 2019/06/25

Operation Mode: ESI Positive Ion Mode

Elemental composition search on mass 450.26

| m/z      | Theo. Mass | Delta (ppm) | RDB equiv. | Composition                                                      |
|----------|------------|-------------|------------|------------------------------------------------------------------|
| 450.2638 | 450.2639   | -0.21       | 11.5       | C <sub>28</sub> H <sub>36</sub> O <sub>4</sub> N                 |
|          | 450.2642   | -0.82       | 13.0       | C <sub>29</sub> H <sub>35</sub> O N <sub>2</sub> Na              |
|          | 450.2628   | 2.16        | 13.5       | C <sub>27</sub> H <sub>33</sub> N <sub>5</sub> Na                |
|          | 450.2625   | 2.77        | 12.0       | C <sub>26</sub> H <sub>34</sub> O <sub>3</sub> N <sub>4</sub>    |
|          | 450.2652   | -3.18       | 16.5       | C <sub>29</sub> H <sub>32</sub> N <sub>5</sub>                   |
|          | 450.2660   | -4.93       | 0.0        | C <sub>17</sub> H <sub>39</sub> O <sub>8</sub> N <sub>4</sub> Na |

Figure S57. HR-ESI-MS data report of paxilline D (5)

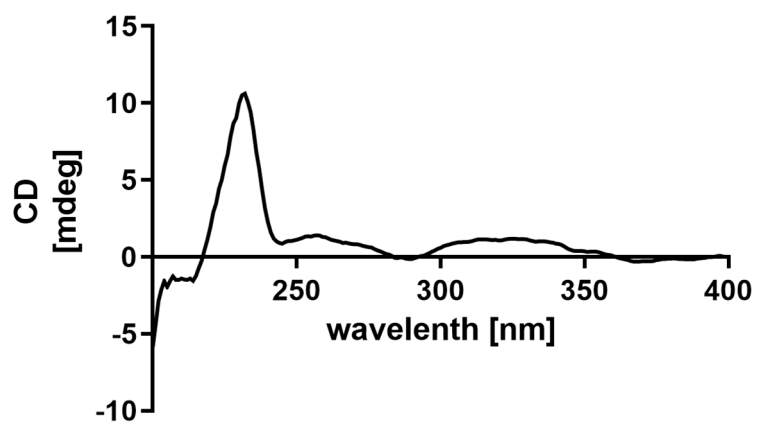

Figure S58. ECD spectrum of paspaline C (**1**)

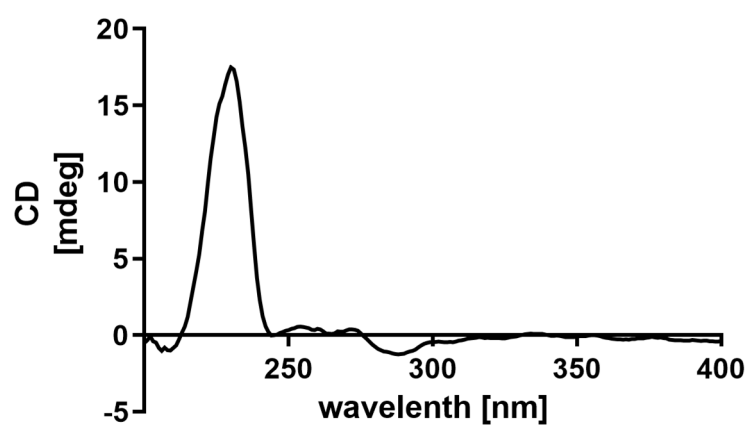

Figure S59. ECD spectrum of paspaline D (**2**)

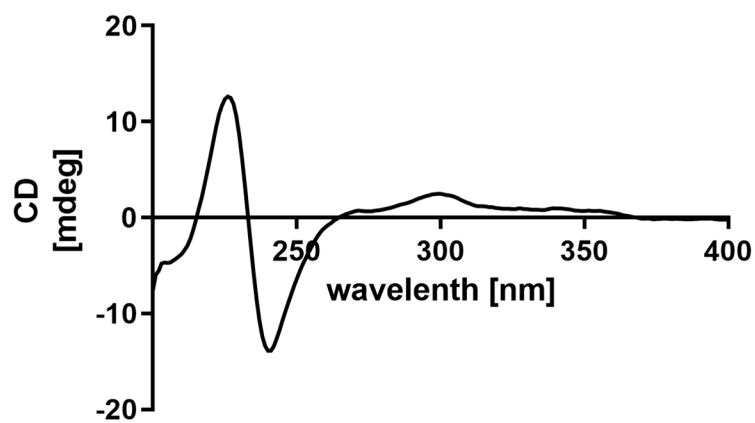

Figure S60. ECD spectrum of paxilline B (3)

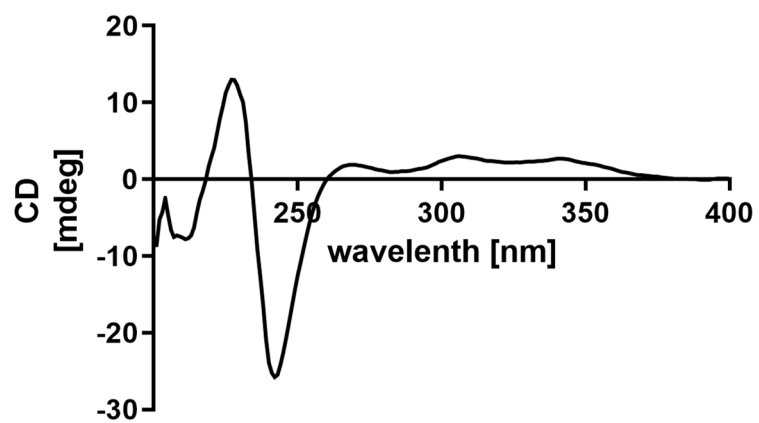

Figure S61. ECD spectrum of paxilline C (4)

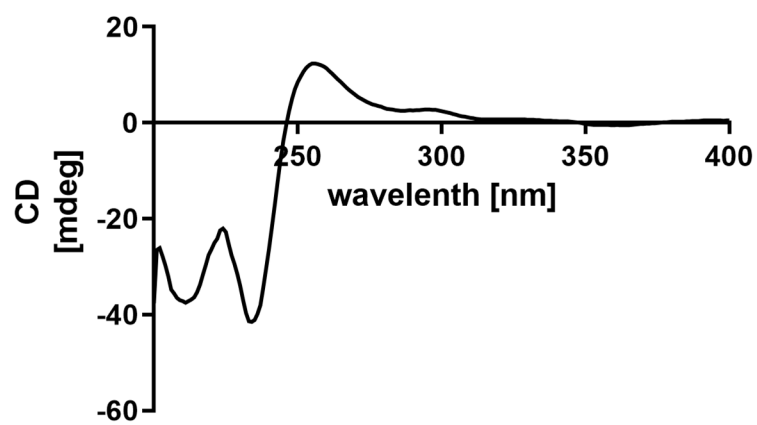

Figure S62. ECD spectrum of paxilline D (**5**)

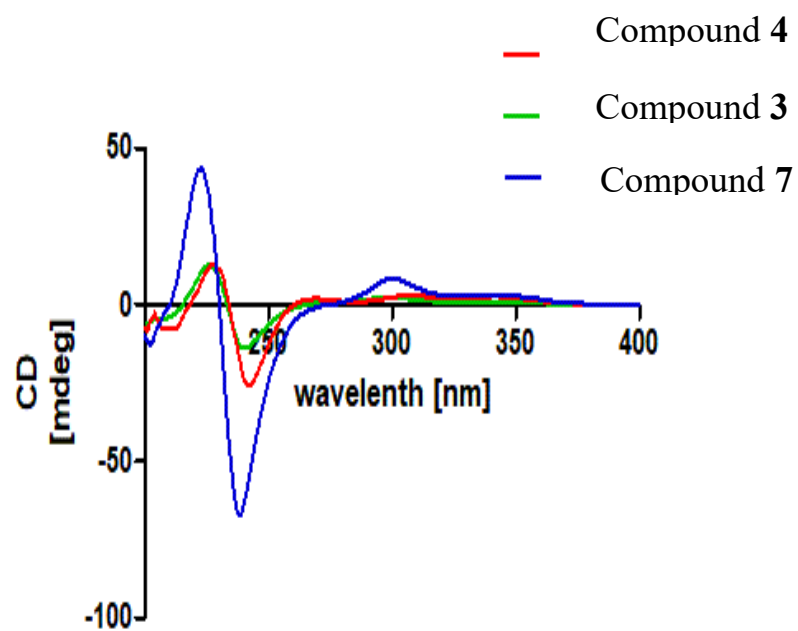

Figure S63. ECD spectrum of compound 3, 4 and 7

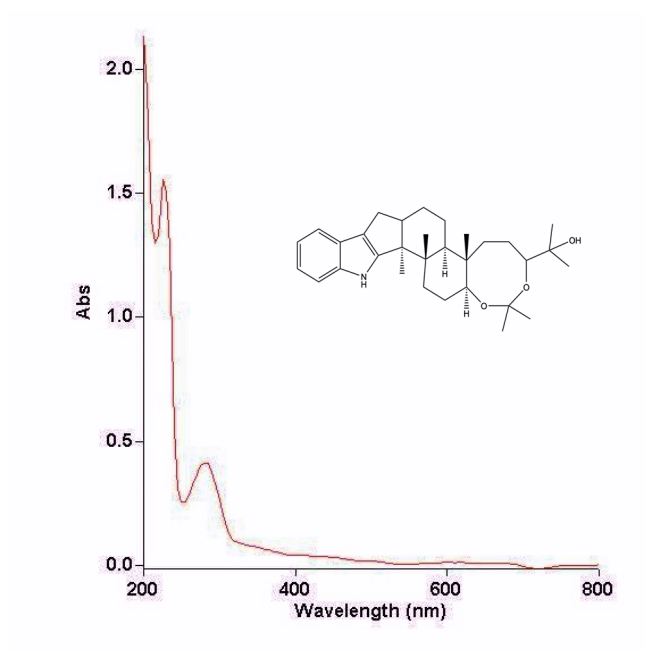

Figure S64. UV spectrum of paspaline C (**1**)

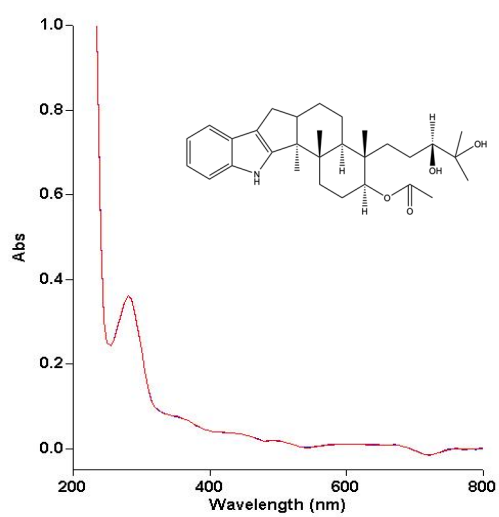

Figure S65. UV spectrum of paspaline D (**2**)

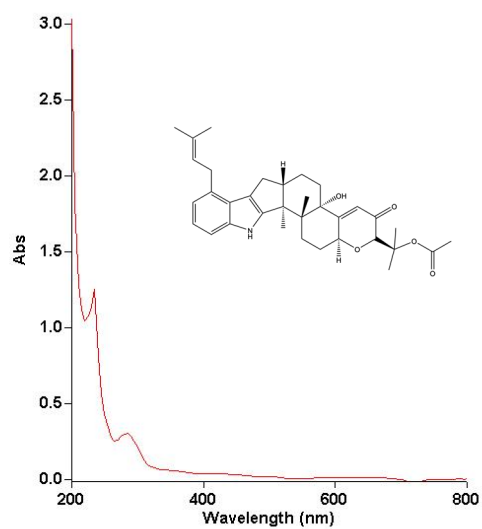

Figure S66. UV spectrum of paxilline B (3)

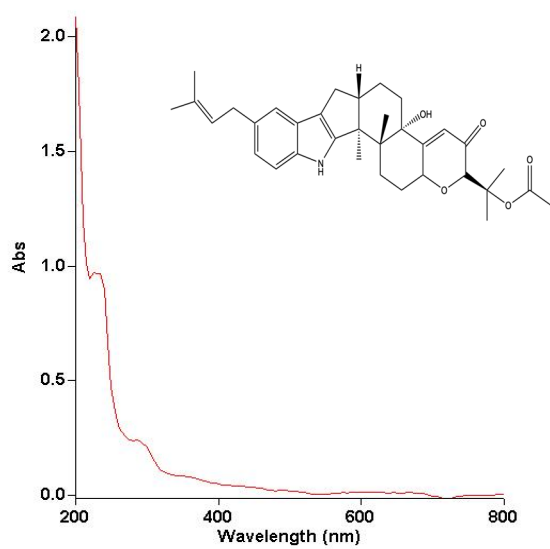

Figure S67. UV spectrum of paxilline C (4)

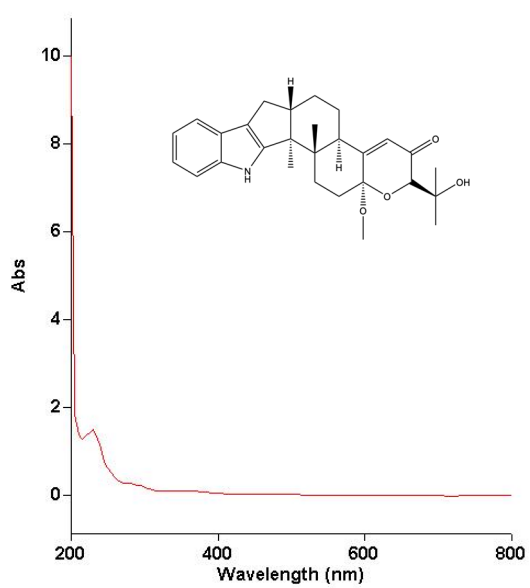

Figure S68. UV spectrum of paxilline D (5)

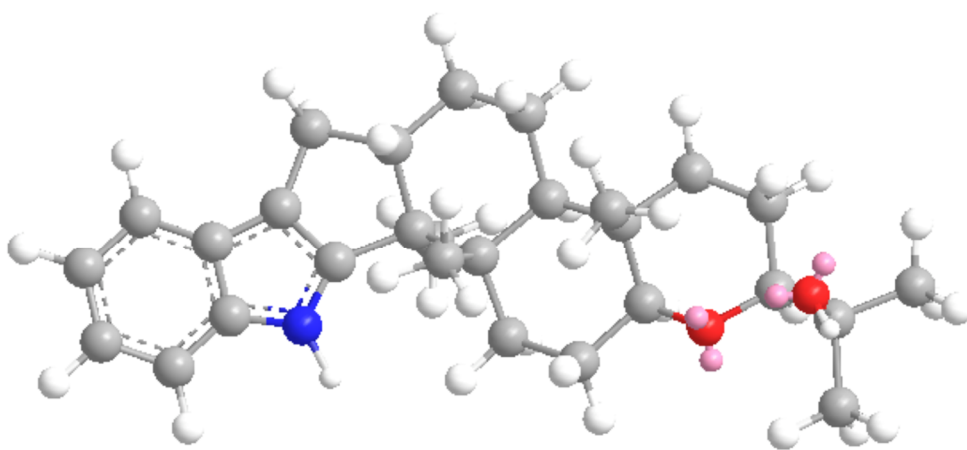

Figure S69. X-ray single crystal diffraction structure of paspaline (6)
